# Supplementary material
Source: PubMed Central journal article supplement (PMC8265326)
Supplement: NIHMS1712726-supplement-Supplementary_Materials.pdf [file NIHMS1712726-supplement-Supplementary_Materials.pdf]

# ChemBioChem

Supporting Information

## **Ratiometric Detection of Glutathione Based on Disulfide Linkage Rupture between a FRET Coumarin Donor and a Rhodamine Acceptor**

Yibin Zhang,\* Shuai Xia, Shulin Wan, Tessa E. Steenwinkel, Tara Vohs, Rudy L. Luck,\* Thomas Werner,\* and Haiying Liu\*

## Contents

|                                                                                                                                                                                                                                                                                                   |    |
|---------------------------------------------------------------------------------------------------------------------------------------------------------------------------------------------------------------------------------------------------------------------------------------------------|----|
| 1. Summary of some reported fluorescent probes .....                                                                                                                                                                                                                                              | 4  |
| 2. Instrumentation.....                                                                                                                                                                                                                                                                           | 6  |
| 3. Determination of probe fluorescence quantum yields .....                                                                                                                                                                                                                                       | 6  |
| 4. Theoretical calculation .....                                                                                                                                                                                                                                                                  | 8  |
| Data for the Glutathione Probe <b>A</b> .....                                                                                                                                                                                                                                                     | 8  |
| <b>Figure S1</b> . GaussView representation of probe <b>A</b> .....                                                                                                                                                                                                                               | 8  |
| <b>Table S1</b> . Calculated atomic coordinates for probe <b>A</b> .....                                                                                                                                                                                                                          | 9  |
| <b>Figure S2</b> . Calculated IR spectrum for probe <b>A</b> .....                                                                                                                                                                                                                                | 11 |
| <b>Figure S3</b> . Calculated UV-Vis spectrum for probe <b>A</b> .....                                                                                                                                                                                                                            | 11 |
| <b>Table S2</b> . Excitation energies and oscillator strengths listing for Probe <b>A</b> .....                                                                                                                                                                                                   | 12 |
| <b>Figure S4</b> . GaussView <sup>17</sup> drawings of orbitals pertaining to Excited State 1 (248, 249) and 6 (247,250), see Table S2. ....                                                                                                                                                      | 13 |
| Data for <b>B</b> .....                                                                                                                                                                                                                                                                           | 14 |
| <b>Figure S5</b> . GaussView representation of N-(7-(2-(benzyl(2-mercaptoethyl)carbamoyl)phenyl)-3-(dimethylamino)-5,6-dihydro-10H-benzo[c]xanthen-10-ylidene)-N-ethylethanaminium, <b>B</b> .....                                                                                                | 14 |
| <b>Table S3</b> . Calculated atomic coordinates for Probe <b>B</b> .....                                                                                                                                                                                                                          | 14 |
| <b>Figure S6</b> . Calculated IR spectrum for probe <b>B</b> .....                                                                                                                                                                                                                                | 16 |
| <b>Figure S7</b> . Calculated UV-Vis spectrum for probe <b>B</b> .....                                                                                                                                                                                                                            | 16 |
| <b>Table S4</b> . Excitation energies and oscillator strengths listing for probe <b>B</b> .....                                                                                                                                                                                                   | 17 |
| <b>Figure 8</b> . Current density difference illustrations as iso-surfaces of <b>B</b> , as indicated for excited state (ES 1, see Table S4). Red areas indicate values for the different density of $-1.552e^{-4}$ and blue are for $1.552e^{-4}$ , see chart on top of the illustration. ....   | 18 |
| Data for <b>C</b> .....                                                                                                                                                                                                                                                                           | 19 |
| <b>Figure S9</b> . GaussView representation of 7-(diethylamino)-N-(2-mercaptoethyl)-2-oxo-2H-chromene-3-carboxamide, <b>C</b> .....                                                                                                                                                               | 19 |
| <b>Table S5</b> . Calculated atomic coordinates for probe <b>C</b> .....                                                                                                                                                                                                                          | 20 |
| <b>Figure S10</b> . Calculated IR spectrum for Probe <b>C</b> .....                                                                                                                                                                                                                               | 21 |
| <b>Figure S11</b> . Calculated UV-Vis spectrum for probe <b>C</b> .....                                                                                                                                                                                                                           | 21 |
| <b>Table S6</b> . Excitation energies and oscillator strengths listing for probe <b>C</b> .....                                                                                                                                                                                                   | 22 |
| <b>Figure S12</b> . Current density difference illustrations as iso-surfaces of <b>C</b> , as indicated for excited state (ES 1, see Table S4). Red areas indicate values for the different density of $-1.667e^{-4}$ and blue are for $1.667e^{-4}$ , see chart on top of the illustration ..... | 23 |
| 5. Kinetic test of probe <b>A</b> with different concentrations of DTT, Cys and Hcy.....                                                                                                                                                                                                          | 24 |

|                                                                                                                                                                                                                                                                                                                                                                                                                                                                                                                   |    |
|-------------------------------------------------------------------------------------------------------------------------------------------------------------------------------------------------------------------------------------------------------------------------------------------------------------------------------------------------------------------------------------------------------------------------------------------------------------------------------------------------------------------|----|
| <b>Figure S13.</b> Fluorescence spectra of time dependent (30 min) test of 5 $\mu\text{M}$ probe <b>A</b> with 100 $\mu\text{M}$ DTT under excitation at 405 nm.....                                                                                                                                                                                                                                                                                                                                              | 24 |
| <b>Figure S15.</b> Fluorescence spectra of time dependent (30 min) test of 5 $\mu\text{M}$ probe <b>A</b> with 500 $\mu\text{M}$ Cys under excitation at 405 nm.....                                                                                                                                                                                                                                                                                                                                              | 25 |
| <b>Figure S16.</b> Fluorescence spectra of time dependent (30 min) test of 5 $\mu\text{M}$ probe <b>A</b> with 1000 $\mu\text{M}$ Cys under excitation at 405 nm.....                                                                                                                                                                                                                                                                                                                                             | 25 |
| <b>Figure S17.</b> Fluorescence spectra of time dependent (30 min) test of 5 $\mu\text{M}$ probe <b>A</b> with 100 $\mu\text{M}$ Hcy under excitation at 405 nm.....                                                                                                                                                                                                                                                                                                                                              | 26 |
| <b>Figure S18.</b> Fluorescence spectra of time dependent (30 min) test of 5 $\mu\text{M}$ probe <b>A</b> with 500 $\mu\text{M}$ Hcy under excitation at 405 nm.....                                                                                                                                                                                                                                                                                                                                              | 26 |
| <b>Figure S19.</b> Fluorescence spectra of time dependent (30 min) test of 5 $\mu\text{M}$ probe <b>A</b> with 1000 $\mu\text{M}$ Hcy under excitation at 405 nm.....                                                                                                                                                                                                                                                                                                                                             | 27 |
| <b>Figure S20.</b> Fluorescence wavelength ratiometric plot of 5 $\mu\text{M}$ probe <b>A</b> with 100 $\mu\text{M}$ different biothiols or DTT for 30 min, constructed by taking the fluorescence intensity at 470 nm divided by the fluorescence intensity at 652 nm under excitation at 405 nm.....                                                                                                                                                                                                            | 27 |
| <b>Figure S21.</b> Fluorescence wavelength ratiometric plot of 5 $\mu\text{M}$ probe <b>A</b> with 500 $\mu\text{M}$ GSH, 500 $\mu\text{M}$ GSH with 500 $\mu\text{M}$ Cys or 500 $\mu\text{M}$ GSH with 500 $\mu\text{M}$ Hcy for 30 min, constructed by taking the fluorescence intensity at 470 nm divided by the fluorescence intensity at 652 nm under excitation at 405 nm. ....                                                                                                                            | 28 |
| 6. Photostability of probe <b>A</b> .....                                                                                                                                                                                                                                                                                                                                                                                                                                                                         | 28 |
| <b>Figure S22.</b> Coumarin and rhodamine fluorescence intensity of 5 $\mu\text{M}$ probe <b>A</b> in the absence (upper, left) and presence (upper, right) of 20 equivalents of GSH in a 20 mM PBS buffer (pH 7.4) containing 30% ethanol under 180-minute excitation at 405 nm or 550 nm. Fluorescence intensity (lower) of 7-(diethylamino)coumarin-3-carboxylic acid in 20 mM PBS buffer (pH 7.4) containing 30% ethanol under 180-minute excitation at 405 nm. Slit: excitation/emission = 5.0/10.0 nm ..... | 29 |
| 7. Ratiometric image of HeLa cells.....                                                                                                                                                                                                                                                                                                                                                                                                                                                                           | 30 |
| <b>Figure S23.</b> Ratiometric cellular fluorescence images of HeLa cells incubated with 10 $\mu\text{M}$ probe <b>A</b> before and after NEM treatment or external GSH incubation. Scale bar: 50 $\mu\text{M}$ . ....                                                                                                                                                                                                                                                                                            | 30 |
| Ratiometric image of <i>Drosophila melanogaster</i> larvae .....                                                                                                                                                                                                                                                                                                                                                                                                                                                  | 31 |
| <b>Figure S24.</b> Ratiometric fluorescence images of <i>Drosophila melanogaster</i> larvae incubated with 10 $\mu\text{M}$ probe <b>A</b> before and after further external GSH incubation. Scale bar: 100 $\mu\text{M}$ .....                                                                                                                                                                                                                                                                                   | 31 |
| <b>Figure S25.</b> $^1\text{H}$ NMR and $^{13}\text{C}$ NMR of compound <b>6</b> in $\text{CDCl}_3$ solution.....                                                                                                                                                                                                                                                                                                                                                                                                 | 32 |
| <b>Figure S26.</b> $^{13}\text{C}$ NMR spectrum of compound <b>6</b> in $\text{CDCl}_3$ solution.....                                                                                                                                                                                                                                                                                                                                                                                                             | 33 |
| <b>Figure S27.</b> $^1\text{H}$ NMR spectrum of probe <b>A</b> in $\text{CDCl}_3$ solution.....                                                                                                                                                                                                                                                                                                                                                                                                                   | 34 |
| <b>Figure S28.</b> $^1\text{H}$ NMR spectrum of probe <b>A</b> in $\text{CDCl}_3$ solution.....                                                                                                                                                                                                                                                                                                                                                                                                                   | 35 |
| <b>Figure S29.</b> HR-MS spectrum of probe <b>A</b> . ....                                                                                                                                                                                                                                                                                                                                                                                                                                                        | 36 |
| <b>Figure S30.</b> HR-MS spectrums of probe <b>A</b> reactions with DTT (top) and GSH (bottom). ....                                                                                                                                                                                                                                                                                                                                                                                                              | 37 |

8. References ..... 38

## 1. Summary of some reported fluorescent probes

| Chemical structure of reported probe                                                | Reactivity (Time) | Sensitivity (LOD)   | Water solubility                         | Cells for imaging | Reference |
|-------------------------------------------------------------------------------------|-------------------|---------------------|------------------------------------------|-------------------|-----------|
| 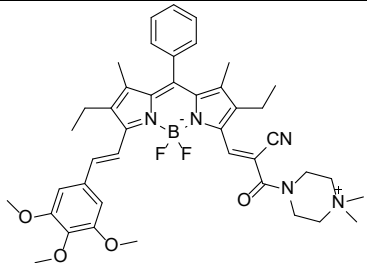   |                   | 3.4 $\mu\text{M}$   | PIPES buffer (50 mM, 100 mM KCl, pH 7.4) | A549 cells        | 1         |
|    | 30 min            | 0.012 $\mu\text{M}$ | HEPES buffer                             | HeLa cells        | 2         |
|    | 38 min            | 23 nM               | PBS buffer                               | HeLa cells        | 3         |
|  | 10 min            | 0.36 $\mu\text{M}$  | PBS buffer                               | HeLa cells        | 4         |
|  | 120 min           | 2.596 $\mu\text{M}$ | PBS buffer                               | A375 cells.       | 5         |
|  | 60 min            | 0.54 $\mu\text{M}$  | PBS buffer                               | HeLa cells        | 6         |

|                                                                                     |        |                    |            |              |    |
|-------------------------------------------------------------------------------------|--------|--------------------|------------|--------------|----|
| 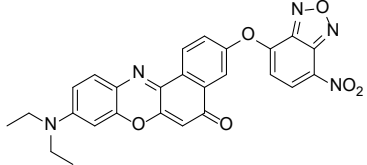   | 30 min | 0.11 $\mu\text{M}$ | PBS buffer | HeLa cells   | 7  |
|    | 8 min  | 39.3 nM            | PBS buffer | HeLa cells   | 8  |
|    |        | 75 nM              | PBS buffer | U87 cells    | 9  |
|   |        | 1.37 $\mu\text{M}$ | PBS buffer | HepG-2 cells | 10 |
|  | 90 min | 0.26 $\mu\text{M}$ | PBS buffer | HeLa cells   | 11 |
|  | 40 min |                    | PBS buffer | HeLa cells   | 12 |

## 2. Instrumentation

400 MHz Inova NMR spectrometer was employed to record  $^1\text{H}$  NMR spectra at 400 MHz, and  $^{13}\text{C}$  NMR spectra at 100 MHz. Chemical shifts ( $\delta$ ) of intermediates and probes were determined by using internal standards in ppm from solvent residual peaks ( $^1\text{H}$ :  $\delta$  7.26 for  $\text{CDCl}_3$ ,  $\delta$  2.50 for  $\text{DMSO-d}_6$ ;  $^{13}\text{C}$ :  $\delta$  77.3 for  $\text{CDCl}_3$ ). High-resolution mass spectra were recorded either on a Fast atom bombardment (FAB) ionization mass spectrometer or a matrix assisted laser desorption/ionization time of flight mass spectrometer. Absorption spectra were carried out using a Perkin Elmer Lambda 35 UV/VIS spectrometer while fluorescence spectra were obtained by using a Jobin Yvon Fluoromax-4 spectrofluorometer with a 420 nm cut-off filter to remove radiation source below 420 nm. A Zeiss LSM510 confocal microscope and an Olympus IX71 inverted microscope (side-port 808nm laser) were used for cellular imaging.

## 3. Determination of probe fluorescence quantum yields

All absorbance spectra and emission spectra were obtained at room temperature using a standard 1 cm path length quartz fluorescence cuvette. The slit widths of excitation and emission of fluorescence measurements were both set to 5 nm. Fluorescence quantum yields were calculated by measuring fluorescence of fluorophores of known quantum yield with the same experimental parameters (excitation wavelength and slit width)<sup>13</sup>. The samples and the reference solutions were freshly prepared under identical conditions. The fluorescence quantum yields were calculated using the following equation<sup>14</sup>:

$$\Phi_X = \Phi_{st}(\text{Grad}_X/\text{Grad}_{st})(\eta_X^2/\eta_{st}^2)$$

where the subscripts 'st' and 'X' stand for standard and test, respectively,  $\Phi$  is the fluorescence quantum yield, "Grad" represents the gradient from the plot of integrated fluorescence intensity versus absorbance and  $\eta$  is the refractive index of the solvent.

Rhodamine 6G (0.95 in ethanol)<sup>15</sup> was used as standard to calculate the quantum yield of the coumarin moiety, and a near-infrared rhodamine dye (0.37 in pH 7.4 PBS buffer with 10% ethanol)<sup>16</sup> below was utilized as a reference standard to calculate the fluorescence quantum yields of the rhodamine moiety in ethanol and buffer solutions. The absorbance was kept between 0.05 and 0.1 to obtain optimized data. All the samples and references were freshly prepared under identical conditions.

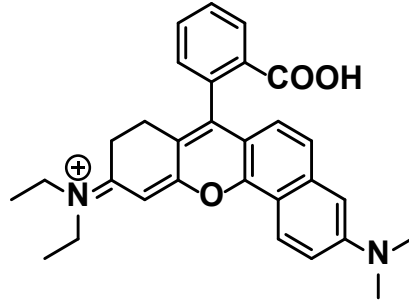

**Near-infrared rhodamine dye as the fluorescence standard**



#### 4. Theoretical calculation

Data for the Glutathione Probe A

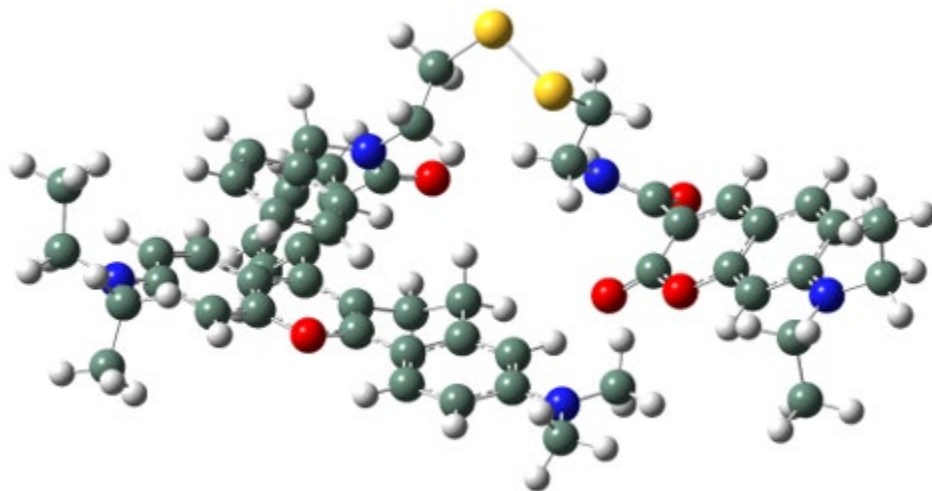

**Figure S1.** GaussView representation of probe A.

**Table S1.** Calculated atomic coordinates for probe A.

| Row | Symbol | X        | Y        | Z        | Row | Symbol | X        | Y        | Z        |
|-----|--------|----------|----------|----------|-----|--------|----------|----------|----------|
| 1   | C      | -7.07542 | 0.38269  | 0.209092 | 42  | N      | 2.851201 | -3.83311 | 0.880863 |
| 2   | C      | -6.83822 | 1.766348 | -0.07668 | 43  | C      | -3.7396  | -0.36234 | -1.85311 |
| 3   | C      | -5.59392 | 2.308485 | 0.312795 | 44  | C      | 4.096767 | -3.66262 | 1.377139 |
| 4   | C      | -4.63751 | 1.486233 | 0.862517 | 45  | O      | 4.651291 | -4.52323 | 2.072464 |
| 5   | C      | -4.84076 | 0.11231  | 1.131553 | 46  | C      | 4.816967 | -2.39827 | 1.032196 |
| 6   | C      | -6.11357 | -0.40349 | 0.785859 | 47  | C      | 4.279507 | -1.11862 | 1.436591 |
| 7   | O      | -3.42652 | 2.054648 | 1.103006 | 48  | O      | 5.01242  | 0.002884 | 1.107248 |
| 8   | C      | -2.38653 | 1.327443 | 1.525655 | 49  | C      | 6.205905 | -0.05398 | 0.447141 |
| 9   | C      | -2.53327 | -0.0253  | 1.876189 | 50  | C      | 6.76961  | -1.29927 | 0.09934  |
| 10  | C      | -3.76021 | -0.64211 | 1.654398 | 51  | C      | 6.042156 | -2.46664 | 0.42321  |
| 11  | C      | -1.13601 | 2.004916 | 1.560638 | 52  | C      | 6.817215 | 1.149843 | 0.163491 |
| 12  | C      | 0.053019 | 1.2377   | 1.700519 | 53  | C      | 8.063215 | 1.168136 | -0.50849 |
| 13  | C      | -0.05347 | -0.25838 | 1.822478 | 54  | C      | 8.647687 | -0.09007 | -0.86024 |
| 14  | C      | -1.3397  | -0.66304 | 2.534609 | 55  | C      | 8.016015 | -1.2739  | -0.56302 |
| 15  | C      | -3.96122 | -2.08355 | 1.921952 | 56  | N      | 8.678007 | 2.340406 | -0.80931 |
| 16  | C      | -3.26415 | -3.07134 | 1.206931 | 57  | C      | 10.0072  | 2.390493 | -1.40635 |
| 17  | C      | -3.52469 | -4.42159 | 1.465431 | 58  | C      | 8.037299 | 3.626585 | -0.56364 |
| 18  | C      | -4.47076 | -4.79618 | 2.414807 | 59  | O      | 3.244787 | -0.93079 | 2.058823 |
| 19  | C      | -5.15133 | -3.81662 | 3.13923  | 60  | C      | -2.73247 | 0.563577 | -1.57313 |
| 20  | C      | -4.8972  | -2.47154 | 2.89002  | 61  | C      | -2.85909 | 1.894958 | -1.97224 |
| 21  | N      | -7.75699 | 2.513496 | -0.73124 | 62  | C      | -3.99965 | 2.316906 | -2.65204 |
| 22  | C      | -7.46713 | 3.877096 | -1.15954 | 63  | C      | -5.01498 | 1.398154 | -2.93016 |
| 23  | C      | -7.79122 | 4.914493 | -0.08811 | 64  | C      | -4.88226 | 0.068928 | -2.53715 |
| 24  | C      | -9.03166 | 1.263313 | -2.458   | 65  | C      | -3.64872 | -1.82163 | -1.45692 |
| 25  | C      | -9.06197 | 1.984907 | -1.11325 | 66  | C      | 9.97515  | 2.332984 | -2.93152 |
| 26  | C      | -2.13054 | -2.80393 | 0.255426 | 67  | C      | 8.285697 | 4.157384 | 0.846398 |
| 27  | O      | -1.00391 | -3.19445 | 0.588057 | 68  | H      | -8.01627 | -0.07546 | -0.06897 |
| 28  | N      | -2.34825 | -2.21535 | -0.94468 | 69  | H      | -5.33268 | 3.343417 | 0.136582 |
| 29  | C      | -1.02992 | 3.400344 | 1.367478 | 70  | H      | -6.32336 | -1.45393 | 0.95967  |
| 30  | C      | 0.194412 | 4.022526 | 1.333751 | 71  | H      | -0.04483 | -0.69893 | 0.815249 |
| 31  | C      | 1.396812 | 3.266442 | 1.475595 | 72  | H      | 0.823626 | -0.66021 | 2.334591 |
| 32  | C      | 1.283681 | 1.858844 | 1.651875 | 73  | H      | -1.30314 | -0.314   | 3.577259 |
| 33  | N      | 2.607296 | 3.870117 | 1.441651 | 74  | H      | -1.43565 | -1.74839 | 2.564951 |
| 34  | C      | 3.820895 | 3.077022 | 1.520026 | 75  | H      | -2.97336 | -5.17836 | 0.914451 |
| 35  | C      | 2.71682  | 5.307715 | 1.264109 | 76  | H      | -4.66772 | -5.84902 | 2.596001 |
| 36  | C      | -1.2211  | -2.15546 | -1.87384 | 77  | H      | -5.87902 | -4.09814 | 3.895052 |
| 37  | C      | -0.85476 | -3.53342 | -2.41318 | 78  | H      | -5.42154 | -1.70287 | 3.451356 |
| 38  | S      | 0.516631 | -3.51193 | -3.62793 | 79  | H      | -6.42011 | 3.939801 | -1.47079 |
| 39  | S      | 1.990076 | -2.30715 | -2.82618 | 80  | H      | -8.05921 | 4.064934 | -2.06039 |
| 40  | C      | 2.795967 | -3.3227  | -1.53807 | 81  | H      | -7.56921 | 5.92155  | -0.45518 |
| 41  | C      | 2.20887  | -3.0402  | -0.15437 | 82  | H      | -8.8518  | 4.876139 | 0.180556 |

| Row | Symbol | X        | Y        | Z        | Row | Symbol | X        | Y        | Z        |
|-----|--------|----------|----------|----------|-----|--------|----------|----------|----------|
| 83  | H      | -7.2059  | 4.744755 | 0.820802 | 106 | H      | 2.429511 | -4.72307 | 1.116509 |
| 84  | H      | -10.0302 | 0.896616 | -2.71616 | 107 | H      | 6.456673 | -3.43967 | 0.167352 |
| 85  | H      | -8.70138 | 1.937889 | -3.25448 | 108 | H      | 6.329937 | 2.059774 | 0.484788 |
| 86  | H      | -8.34799 | 0.409219 | -2.43349 | 109 | H      | 9.593132 | -0.1232  | -1.38731 |
| 87  | H      | -9.43694 | 1.331793 | -0.32063 | 110 | H      | 8.475805 | -2.21611 | -0.85014 |
| 88  | H      | -9.75225 | 2.833048 | -1.15084 | 111 | H      | 10.47453 | 3.322281 | -1.07238 |
| 89  | H      | -1.93245 | 3.992475 | 1.2504   | 112 | H      | 10.62152 | 1.585376 | -0.99317 |
| 90  | H      | 0.233254 | 5.095881 | 1.192388 | 113 | H      | 8.42934  | 4.329448 | -1.30542 |
| 91  | H      | 2.168048 | 1.237713 | 1.749585 | 114 | H      | 6.965699 | 3.541717 | -0.77028 |
| 92  | H      | 3.875138 | 2.353972 | 0.699743 | 115 | H      | -1.84483 | 0.253347 | -1.03016 |
| 93  | H      | 4.681126 | 3.741876 | 1.457865 | 116 | H      | -2.06794 | 2.601936 | -1.73579 |
| 94  | H      | 3.880303 | 2.526185 | 2.465046 | 117 | H      | -4.10201 | 3.354747 | -2.95841 |
| 95  | H      | 2.185278 | 5.846511 | 2.055915 | 118 | H      | -5.91489 | 1.719651 | -3.44799 |
| 96  | H      | 3.767002 | 5.590567 | 1.310456 | 119 | H      | -5.67552 | -0.64264 | -2.75671 |
| 97  | H      | 2.318303 | 5.625116 | 0.293167 | 120 | H      | -4.40476 | -2.05429 | -0.70266 |
| 98  | H      | -1.49354 | -1.48866 | -2.69406 | 121 | H      | -3.88706 | -2.44454 | -2.32956 |
| 99  | H      | -0.36046 | -1.71691 | -1.36198 | 122 | H      | 10.98997 | 2.396641 | -3.33721 |
| 100 | H      | -0.606   | -4.21443 | -1.59677 | 123 | H      | 9.523057 | 1.400771 | -3.28397 |
| 101 | H      | -1.68517 | -3.9641  | -2.98402 | 124 | H      | 9.393219 | 3.165667 | -3.33981 |
| 102 | H      | 2.705737 | -4.37892 | -1.81101 | 125 | H      | 7.797864 | 5.128499 | 0.978656 |
| 103 | H      | 3.856609 | -3.05125 | -1.57049 | 126 | H      | 7.895202 | 3.47295  | 1.605705 |
| 104 | H      | 2.299512 | -1.97918 | 0.088178 | 127 | H      | 9.357296 | 4.287425 | 1.028893 |
| 105 | H      | 1.142602 | -3.27303 | -0.1254  |     |        |          |          |          |

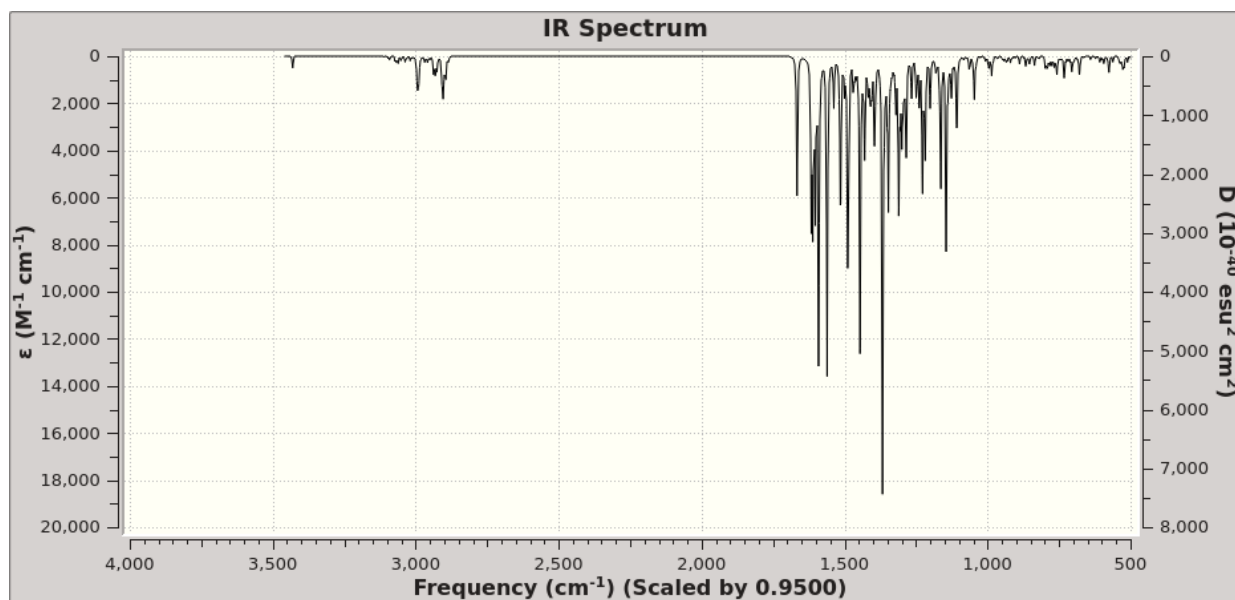

Figure S2. Calculated IR spectrum for probe A.

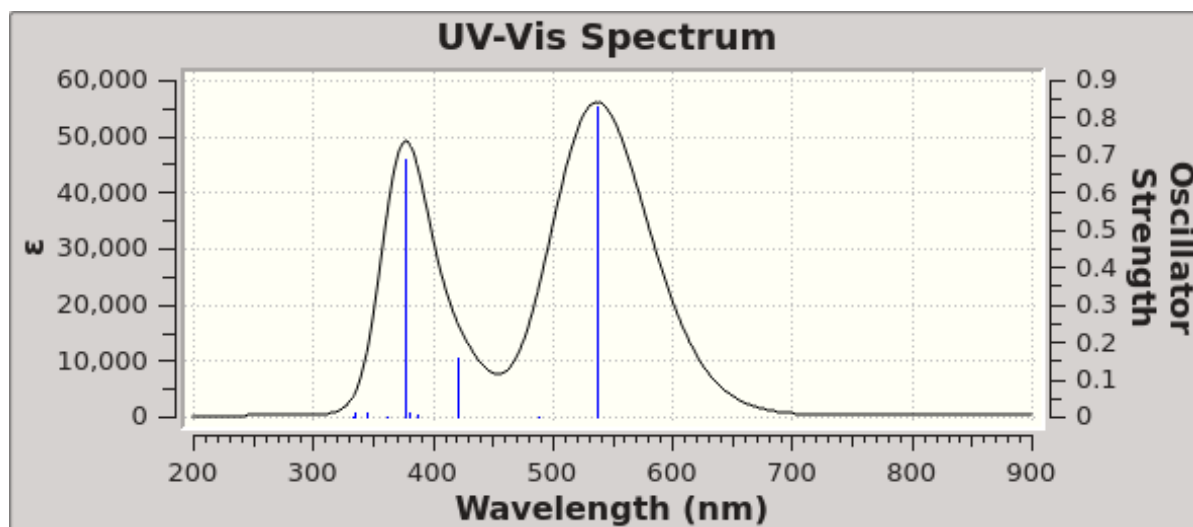

Figure S3. Calculated UV-Vis spectrum for probe A.

**Table S2.** Excitation energies and oscillator strengths listing for Probe A.

| <b>Excited State</b> | <b>Nature</b> | <b>E (eV)</b> | <b><math>\lambda</math>(nm)</b> | <b><math>f</math></b> | <b>Orbital transitions</b>                                         | <b>Normalized coefficient</b>                       |
|----------------------|---------------|---------------|---------------------------------|-----------------------|--------------------------------------------------------------------|-----------------------------------------------------|
| 1:                   | A             | 2.3062        | 537.62                          | 0.8280                | 248 -> 249                                                         | 0.70104                                             |
| 2:                   | A             | 2.5400        | 488.12                          | 0.0001                | 247 -> 249                                                         | 0.70667                                             |
| 3:                   | A             | 2.9483        | 420.53                          | 0.1576                | 246 -> 249                                                         | 0.68419                                             |
| 4:                   | A             | 3.2058        | 386.75                          | 0.0041                | 248 -> 250                                                         | 0.69927                                             |
| 5:                   | A             | 3.2520        | 381.25                          | 0.0097                | 244 -> 249<br>245 -> 249                                           | -0.14485<br>0.68249                                 |
| 6:                   | A             | 3.2930        | 376.50                          | 0.6879                | 247 -> 250                                                         | 0.69836                                             |
| 7:                   | A             | 3.4244        | 362.06                          | 0.0002                | 243 -> 249<br>244 -> 249<br>245 -> 249                             | -0.28382<br>0.61799<br>0.16062                      |
| 8:                   | A             | 3.5907        | 345.29                          | 0.0111                | 241 -> 249<br>243 -> 249                                           | 0.66556<br>-0.20804                                 |
| 9:                   | A             | 3.7043        | 334.70                          | 0.0083                | 240 -> 249<br>241 -> 249<br>243 -> 249<br>244 -> 249               | 0.48630<br>-0.18954<br>-0.40937<br>-0.20961         |
| 10:                  | A             | 3.7142        | 333.81                          | 0.0013                | 239 -> 249<br>240 -> 249<br>241 -> 249<br>243 -> 249<br>244 -> 249 | 0.37814<br>0.42783<br>0.10634<br>0.34219<br>0.15859 |

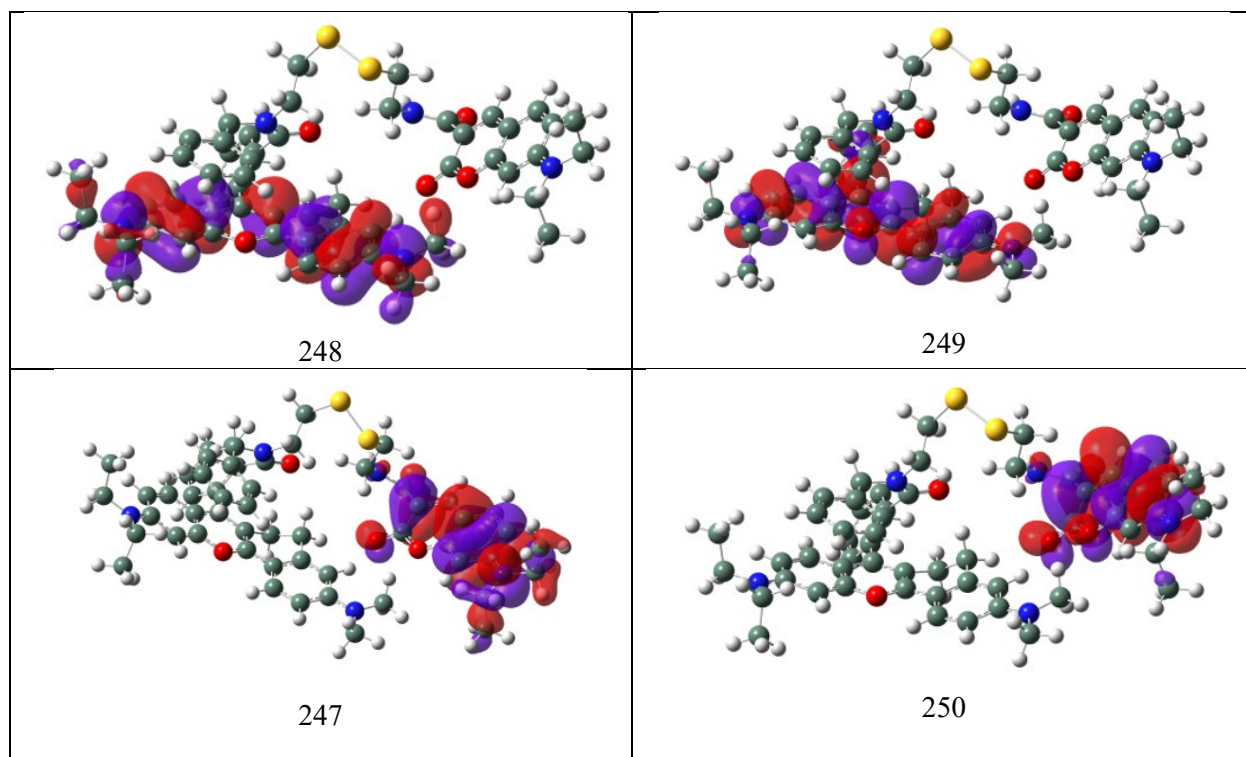

**Figure S4.** GaussView<sup>17</sup> drawings of orbitals pertaining to Excited State 1 (248, 249) and 6 (247,250), see Table S2.

Data for B.

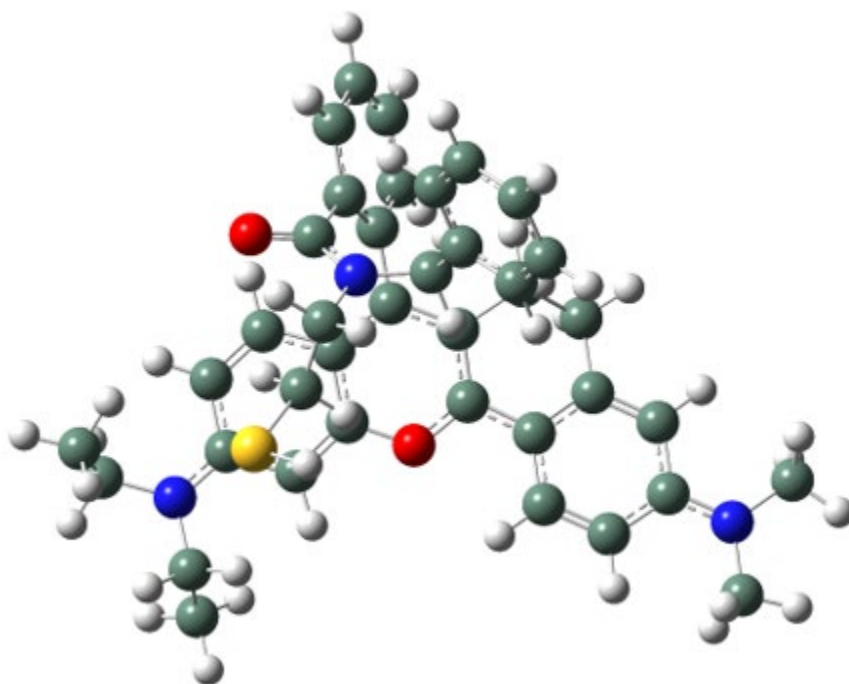

**Figure S5.** GaussView representation of N-(7-(2-(benzyl(2-mercaptoethyl)carbamoyl)phenyl)-3-(dimethylamino)-5,6-dihydro-10H-benzo[c]xanthen-10-ylidene)-N-ethylethanaminium, **B**.

**Table S3.** Calculated atomic coordinates for Probe **B**.

| Row | Symbol | X        | Y        | Z        | Row | Symbol | X        | Y        | Z        |
|-----|--------|----------|----------|----------|-----|--------|----------|----------|----------|
| 1   | C      | 0.625056 | 2.999177 | 4.38781  | 18  | C      | 3.415573 | -1.60302 | 1.307396 |
| 2   | C      | 0.235237 | 1.830731 | 3.746446 | 19  | C      | 2.978434 | -2.66602 | 0.454001 |
| 3   | C      | 0.671717 | 1.547563 | 2.449255 | 20  | C      | 1.591699 | -2.77094 | 0.20801  |
| 4   | C      | 1.532936 | 2.449603 | 1.803678 | 21  | C      | -3.15354 | -2.40278 | -0.46188 |
| 5   | C      | 1.923232 | 3.617811 | 2.457966 | 22  | C      | -4.45586 | -2.67709 | -0.78894 |
| 6   | C      | 1.461947 | 3.902159 | 3.736796 | 23  | C      | -5.52326 | -1.93204 | -0.20981 |
| 7   | C      | 0.221412 | 0.297218 | 1.794251 | 24  | C      | -5.18757 | -0.91055 | 0.718958 |
| 8   | C      | 1.169017 | -0.69698 | 1.453899 | 25  | N      | -6.80862 | -2.18822 | -0.53349 |
| 9   | C      | 0.74101  | -1.81132 | 0.70126  | 26  | C      | -7.88516 | -1.41442 | 0.056824 |
| 10  | O      | -0.57711 | -1.96715 | 0.415918 | 27  | C      | -7.13774 | -3.24303 | -1.47504 |
| 11  | C      | -1.48891 | -1.07081 | 0.804131 | 28  | N      | 3.85836  | -3.5266  | -0.09894 |
| 12  | C      | -1.12089 | 0.100874 | 1.482886 | 29  | C      | 3.436853 | -4.52758 | -1.07123 |
| 13  | C      | -2.82974 | -1.37292 | 0.445837 | 30  | C      | 5.291708 | -3.44487 | 0.157639 |
| 14  | C      | -3.88076 | -0.63261 | 1.043391 | 31  | C      | 2.998214 | -5.83351 | -0.42125 |
| 15  | C      | -3.5287  | 0.401044 | 2.074426 | 32  | C      | 5.990353 | -2.43746 | -0.74734 |
| 16  | C      | -2.22412 | 1.100567 | 1.711229 | 33  | C      | 2.17821  | 2.156658 | 0.478516 |
| 17  | C      | 2.544728 | -0.66059 | 1.777605 | 34  | O      | 3.401537 | 2.034005 | 0.43943  |

| Row | Symbol | X        | Y        | Z        | Row | Symbol | X        | Y        | Z        |
|-----|--------|----------|----------|----------|-----|--------|----------|----------|----------|
| 35  | N      | 1.401421 | 2.011708 | -0.62107 | 77  | H      | -0.33729 | 2.617405 | 0.318267 |
| 36  | C      | -0.0149  | 2.327338 | -0.68198 | 78  | H      | -1.92973 | 2.388675 | -2.60539 |
| 37  | C      | -0.32032 | 3.444858 | -1.64753 | 79  | H      | -2.47549 | 4.241774 | -4.15492 |
| 38  | C      | -1.35832 | 3.313195 | -2.56757 | 80  | H      | -1.16168 | 6.347904 | -4.08445 |
| 39  | C      | -1.6652  | 4.35577  | -3.4402  | 81  | H      | 0.695996 | 6.588377 | -2.45347 |
| 40  | C      | -0.92798 | 5.535917 | -3.4016  | 82  | H      | 1.235044 | 4.735712 | -0.90625 |
| 41  | C      | 0.115975 | 5.670249 | -2.48643 | 83  | H      | 1.418755 | 1.854395 | -2.68898 |
| 42  | C      | 0.416697 | 4.629926 | -1.61392 | 84  | H      | 3.01361  | 2.014527 | -1.95191 |
| 43  | C      | 2.037095 | 1.540362 | -1.84573 | 85  | H      | 2.779016 | -0.26088 | -0.93405 |
| 44  | C      | 2.1816   | 0.02304  | -1.80107 | 86  | H      | 1.208134 | -0.4617  | -1.70869 |
| 45  | S      | 3.072011 | -0.69017 | -3.22038 | 87  | H      | 2.150219 | -0.39779 | -4.16308 |
| 46  | H      | 0.277442 | 3.202504 | 5.396061 |     |        |          |          |          |
| 47  | H      | -0.4058  | 1.117253 | 4.256156 |     |        |          |          |          |
| 48  | H      | 2.596331 | 4.304088 | 1.953086 |     |        |          |          |          |
| 49  | H      | 1.764661 | 4.821007 | 4.229685 |     |        |          |          |          |
| 50  | H      | -4.33593 | 1.13     | 2.17936  |     |        |          |          |          |
| 51  | H      | -3.4221  | -0.09481 | 3.049057 |     |        |          |          |          |
| 52  | H      | -2.38067 | 1.670127 | 0.784938 |     |        |          |          |          |
| 53  | H      | -1.94721 | 1.823675 | 2.477912 |     |        |          |          |          |
| 54  | H      | 2.919713 | 0.149262 | 2.392556 |     |        |          |          |          |
| 55  | H      | 4.462319 | -1.50798 | 1.564393 |     |        |          |          |          |
| 56  | H      | 1.165539 | -3.58014 | -0.36961 |     |        |          |          |          |
| 57  | H      | -2.35771 | -2.97856 | -0.92255 |     |        |          |          |          |
| 58  | H      | -4.66071 | -3.46539 | -1.50218 |     |        |          |          |          |
| 59  | H      | -5.96851 | -0.33304 | 1.19903  |     |        |          |          |          |
| 60  | H      | -7.78545 | -0.35037 | -0.17768 |     |        |          |          |          |
| 61  | H      | -8.83395 | -1.76035 | -0.34504 |     |        |          |          |          |
| 62  | H      | -7.91348 | -1.53319 | 1.144452 |     |        |          |          |          |
| 63  | H      | -8.21736 | -3.29164 | -1.59082 |     |        |          |          |          |
| 64  | H      | -6.69963 | -3.0514  | -2.45929 |     |        |          |          |          |
| 65  | H      | -6.79138 | -4.21812 | -1.11964 |     |        |          |          |          |
| 66  | H      | 2.647202 | -4.1074  | -1.6995  |     |        |          |          |          |
| 67  | H      | 4.283054 | -4.70258 | -1.74021 |     |        |          |          |          |
| 68  | H      | 5.462598 | -3.2203  | 1.212504 |     |        |          |          |          |
| 69  | H      | 5.700691 | -4.44612 | 0.002547 |     |        |          |          |          |
| 70  | H      | 2.151091 | -5.68309 | 0.253168 |     |        |          |          |          |
| 71  | H      | 2.699362 | -6.55729 | -1.18463 |     |        |          |          |          |
| 72  | H      | 3.813892 | -6.27345 | 0.159343 |     |        |          |          |          |
| 73  | H      | 5.598319 | -1.4277  | -0.59929 |     |        |          |          |          |
| 74  | H      | 7.063933 | -2.41874 | -0.54017 |     |        |          |          |          |
| 75  | H      | 5.854059 | -2.69731 | -1.80075 |     |        |          |          |          |
| 76  | H      | -0.57702 | 1.429188 | -0.95654 |     |        |          |          |          |



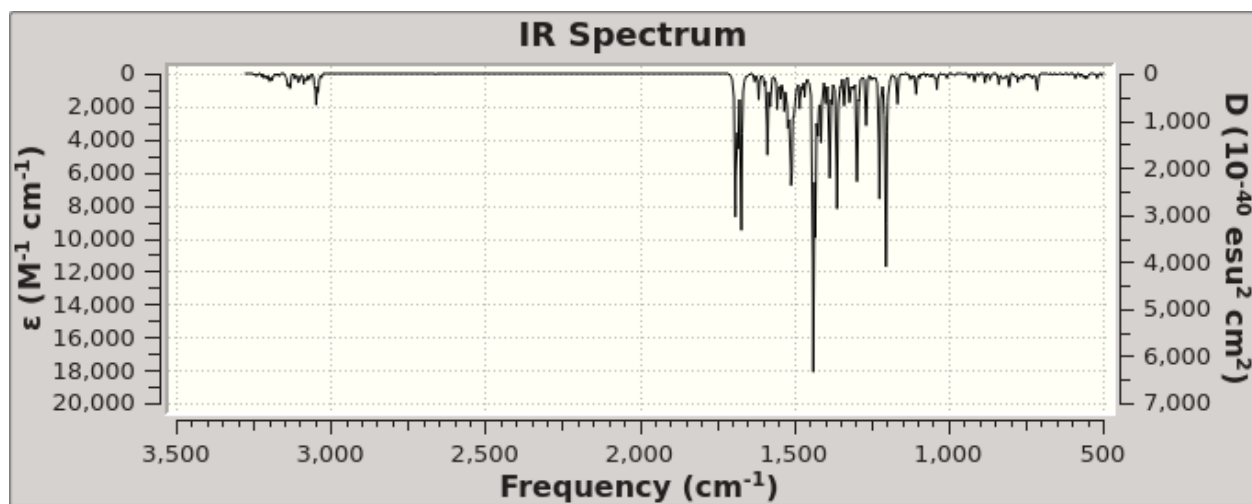

Figure S6. Calculated IR spectrum for probe B.

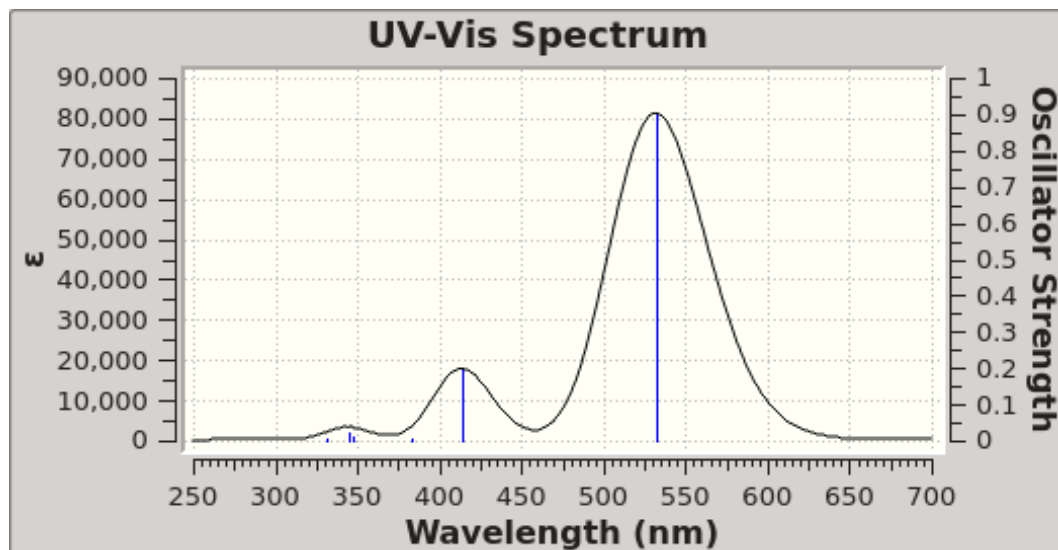

Figure S7. Calculated UV-Vis spectrum for probe B.

**Table S4.** Excitation energies and oscillator strengths listing for probe **B**.

| <b>Excited State</b> | <b>Nature</b> | <b>E (eV)</b> | <b><math>\lambda</math> (nm)</b> | <b><math>f</math></b> | <b>Orbital transitions</b>                           | <b>Normalized coefficient</b>               |
|----------------------|---------------|---------------|----------------------------------|-----------------------|------------------------------------------------------|---------------------------------------------|
| 1:                   | A             | 2.3304        | 532.03                           | 0.9011                | 164 -> 165                                           | 0.70160                                     |
| 2:                   | A             | 2.9961        | 413.82                           | 0.1955                | 163 -> 165                                           | 0.68669                                     |
| 3:                   | A             | 3.2334        | 383.45                           | 0.0030                | 162 -> 165                                           | 0.69886                                     |
| 4:                   | A             | 3.5665        | 347.64                           | 0.0117                | 160 -> 165<br>161 -> 165                             | 0.33730<br>0.59831                          |
| 5:                   | A             | 3.5996        | 344.44                           | 0.0203                | 156 -> 165<br>159 -> 165<br>160 -> 165<br>161 -> 165 | -0.12737<br>-0.13730<br>0.59072<br>-0.33178 |
| 6:                   | A             | 3.7415        | 331.38                           | 0.0056                | 156 -> 165<br>157 -> 165<br>158 -> 165<br>164 -> 166 | -0.11208<br>-0.20537<br>0.60391<br>0.23510  |

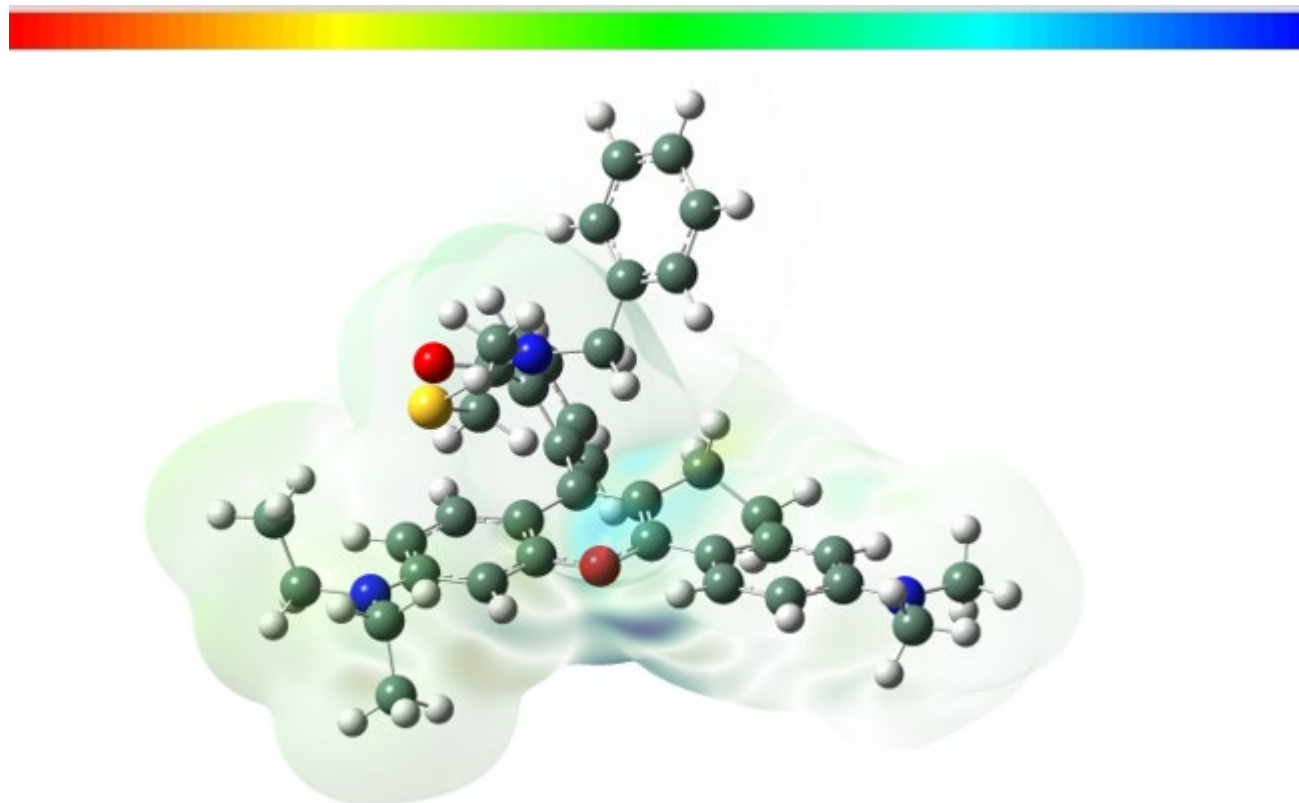

**Figure 8.** Current density difference illustrations as iso-surfaces of **B**, as indicated for excited state (ES 1, see Table S4). Red areas indicate values for the different density of  $-1.552e^{-4}$  and blue are for  $1.552e^{-4}$ , see chart on top of the illustration.

Data for C.

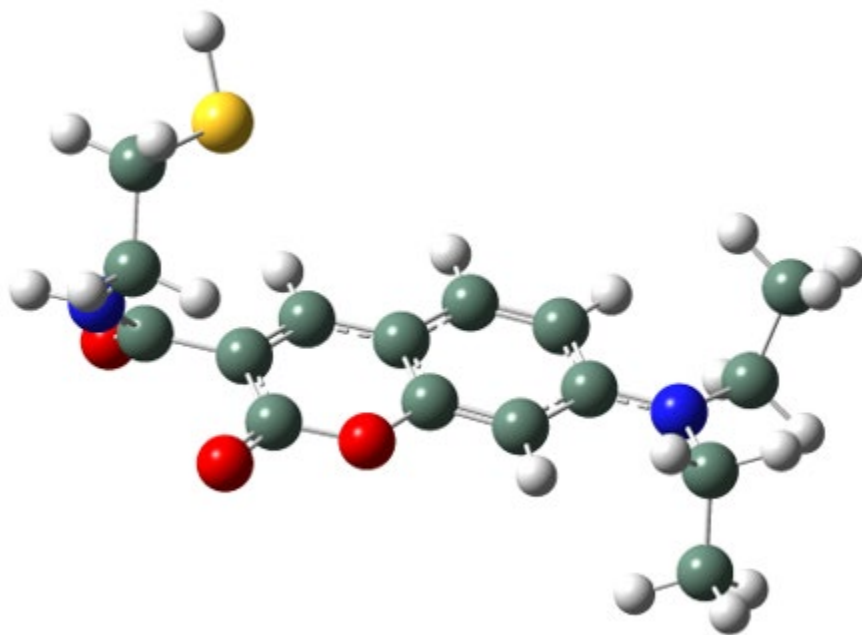

**Figure S9.** GaussView representation of 7-(diethylamino)-N-(2-mercaptoethyl)-2-oxo-2H-chromene-3-carboxamide, C.

**Table S5.** Calculated atomic coordinates for probe C.

| Row | Symbol | X        | Y        | Z        |
|-----|--------|----------|----------|----------|
| 1   | S      | 3.408661 | 2.224012 | -0.87622 |
| 2   | C      | 4.611519 | 1.057013 | -1.62033 |
| 3   | C      | 4.264381 | -0.37488 | -1.23188 |
| 4   | N      | 4.424109 | -0.63583 | 0.184108 |
| 5   | C      | 3.476992 | -0.58223 | 1.146396 |
| 6   | O      | 3.773011 | -0.50276 | 2.339022 |
| 7   | C      | 2.043229 | -0.61486 | 0.735358 |
| 8   | C      | 1.531369 | -1.68919 | -0.08317 |
| 9   | O      | 0.177823 | -1.66488 | -0.36962 |
| 10  | C      | -0.66548 | -0.70034 | 0.092123 |
| 11  | C      | -0.18293 | 0.323128 | 0.930087 |
| 12  | C      | 1.190271 | 0.323751 | 1.245496 |
| 13  | C      | -1.98711 | -0.79293 | -0.2854  |
| 14  | C      | -2.91977 | 0.167436 | 0.169441 |
| 15  | C      | -2.43781 | 1.210468 | 1.018796 |
| 16  | C      | -1.11752 | 1.276402 | 1.380504 |
| 17  | O      | 2.163484 | -2.62215 | -0.53426 |
| 18  | N      | -4.22564 | 0.103344 | -0.1881  |
| 19  | C      | -5.22596 | 1.011146 | 0.35768  |
| 20  | C      | -4.71478 | -0.88865 | -1.13525 |
| 21  | C      | -5.09599 | -2.20674 | -0.47171 |
| 22  | C      | -5.35856 | 2.301062 | -0.44252 |
| 23  | H      | 4.582309 | 1.149563 | -2.70856 |
| 24  | H      | 5.617787 | 1.313138 | -1.2798  |
| 25  | H      | 3.245859 | -0.61647 | -1.53065 |
| 26  | H      | 4.918751 | -1.05602 | -1.78324 |
| 27  | H      | 5.368393 | -0.59679 | 0.545463 |
| 28  | H      | 1.585639 | 1.098939 | 1.896735 |
| 29  | H      | -2.27969 | -1.6248  | -0.91256 |
| 30  | H      | -3.11251 | 1.978013 | 1.375118 |
| 31  | H      | -0.77493 | 2.08387  | 2.021631 |
| 32  | H      | -6.17735 | 0.47247  | 0.366158 |
| 33  | H      | -4.99822 | 1.216692 | 1.406166 |
| 34  | H      | -5.58255 | -0.45404 | -1.63868 |
| 35  | H      | -3.96751 | -1.04046 | -1.9182  |
| 36  | H      | -5.88446 | -2.05612 | 0.271241 |
| 37  | H      | -5.46686 | -2.91712 | -1.21612 |
| 38  | H      | -4.24147 | -2.66242 | 0.035437 |
| 39  | H      | -5.63647 | 2.091219 | -1.4794  |
| 40  | H      | -6.1325  | 2.941975 | -0.01039 |

| Row | Symbol | X        | Y        | Z        |
|-----|--------|----------|----------|----------|
| 41  | H      | -4.42079 | 2.862851 | -0.45486 |
| 42  | H      | 4.042975 | 3.353521 | -1.25284 |

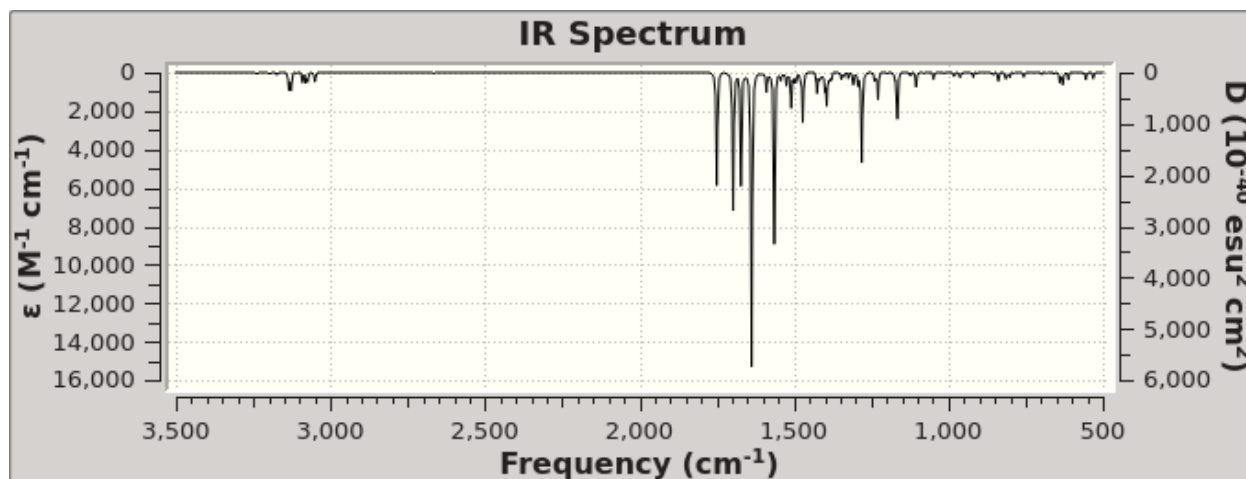

Figure S10. Calculated IR spectrum for Probe C.

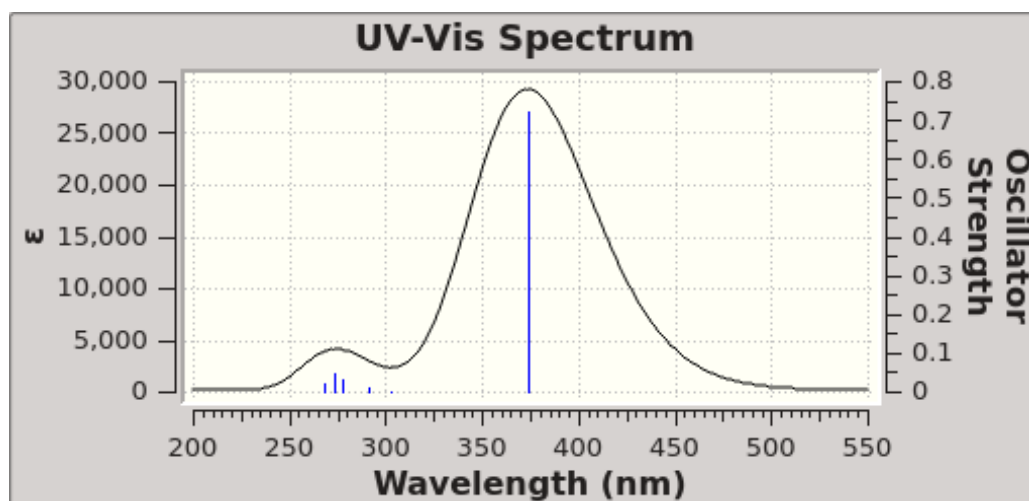

Figure S11. Calculated UV-Vis spectrum for probe C.

**Table S6.** Excitation energies and oscillator strengths listing for probe C.

| <b>Excited State</b> | <b>Nature</b> | <b>E (eV)</b> | <b><math>\lambda</math>(nm)</b> | <b><math>f</math></b> | <b>Orbital transitions</b>                                                       | <b>Normalized coefficient</b>                                               |
|----------------------|---------------|---------------|---------------------------------|-----------------------|----------------------------------------------------------------------------------|-----------------------------------------------------------------------------|
| 1:                   | A             | 3.3182        | 373.65                          | 0.7191                | 85 -> 86                                                                         | 0.70046                                                                     |
| 2:                   | A             | 4.0987        | 302.50                          | 0.0017                | 84 -> 86                                                                         | 0.70498                                                                     |
| 3:                   | A             | 4.2561        | 291.31                          | 0.0079                | 83 -> 86<br>85 -> 87<br>85 -> 88                                                 | 0.55577<br>-0.38747<br>0.14053                                              |
| 4:                   | A             | 4.4624        | 277.84                          | 0.0295                | 80 -> 86<br>81 -> 86<br>82 -> 86<br>83 -> 86<br>85 -> 87                         | 0.12760<br>-0.24294<br>0.38036<br>0.34045<br>0.38640                        |
| 5:                   | A             | 4.5443        | 272.84                          | 0.0464                | 82 -> 86<br>83 -> 86<br>85 -> 87                                                 | 0.54729<br>-0.22418<br>-0.35543                                             |
| 6:                   | A             | 4.6306        | 267.75                          | 0.0198                | 79 -> 86<br>80 -> 86<br>81 -> 86<br>82 -> 86<br>83 -> 86<br>85 -> 87<br>85 -> 88 | 0.11731<br>-0.24039<br>0.56418<br>0.18408<br>0.10310<br>0.17768<br>-0.14201 |

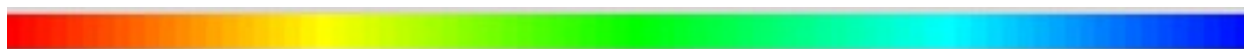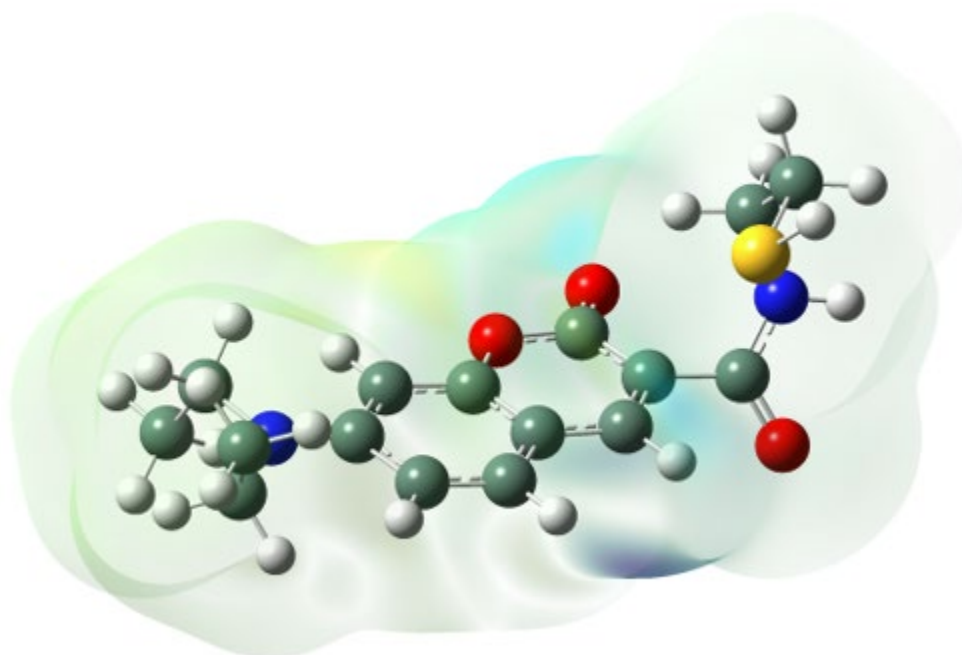

**Figure S12.** Current density difference illustrations as iso-surfaces of  $\mathbf{C}$ , as indicated for excited state (ES 1, see Table S4). Red areas indicate values for the different density of  $-1.667e^{-4}$  and blue are for  $1.667e^{-4}$ , see chart on top of the illustration



5. Kinetic test of probe A with different concentrations of DTT, Cys and Hcy.

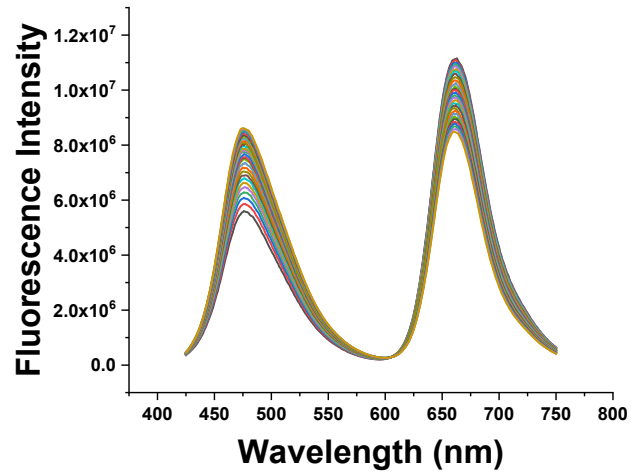

**Figure S13.** Fluorescence spectra of time dependent (30 min) test of 5  $\mu\text{M}$  probe A with 100  $\mu\text{M}$  DTT under excitation at 405 nm.

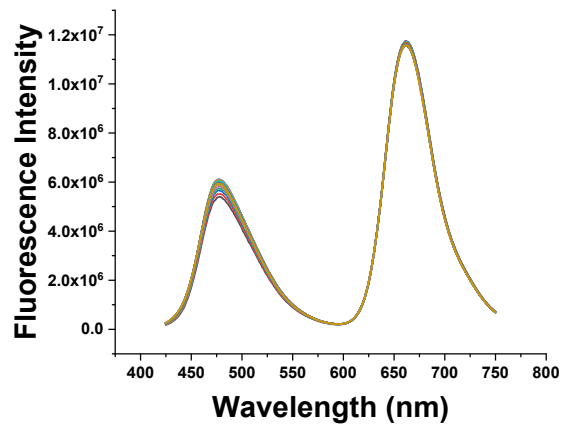

**Figure S14.** Fluorescence spectra of time dependent (30 min) test of 5  $\mu\text{M}$  probe A with 100  $\mu\text{M}$  Cys under excitation at 405 nm.

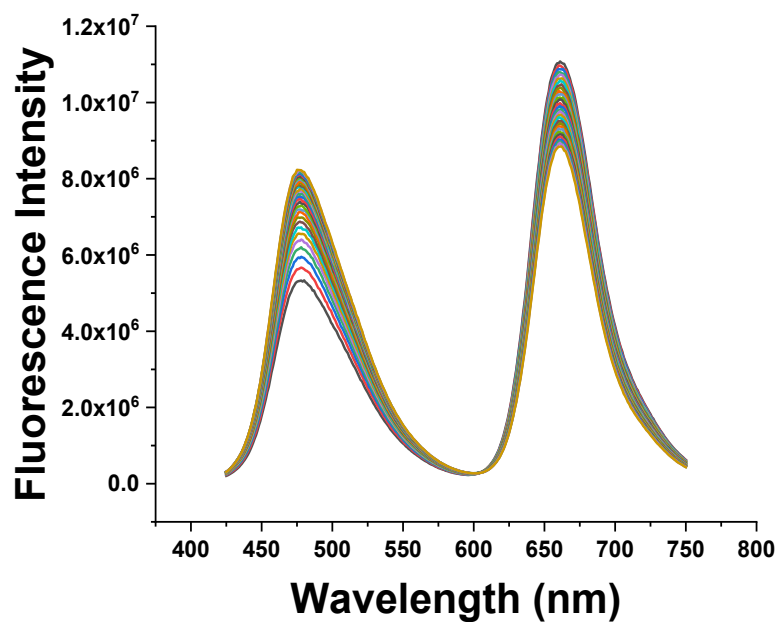

**Figure S15.** Fluorescence spectra of time dependent (30 min) test of 5  $\mu\text{M}$  probe A with 500  $\mu\text{M}$  Cys under excitation at 405 nm.

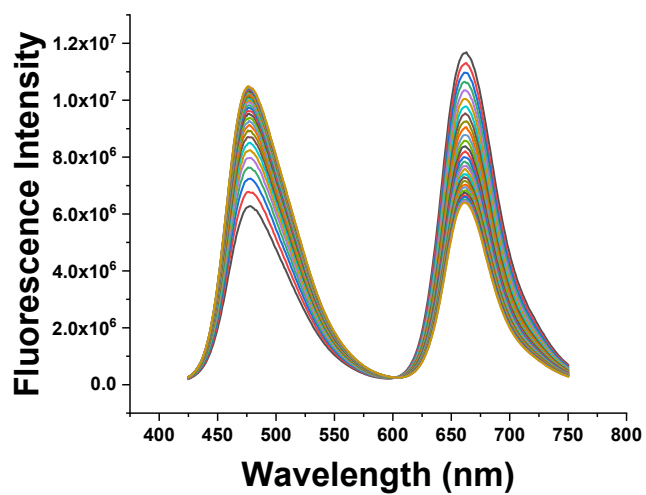

**Figure S16.** Fluorescence spectra of time dependent (30 min) test of 5  $\mu\text{M}$  probe A with 1000  $\mu\text{M}$  Cys under excitation at 405 nm.

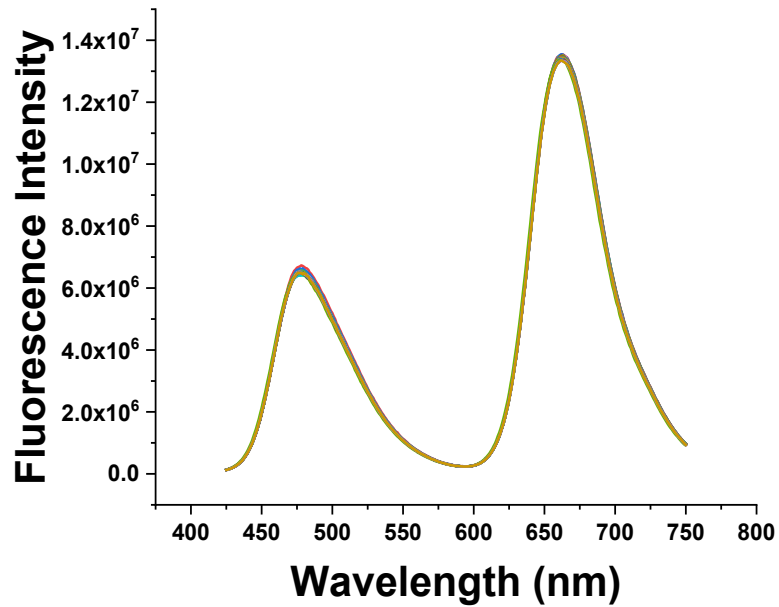

**Figure S17.** Fluorescence spectra of time dependent (30 min) test of 5  $\mu\text{M}$  probe **A** with 100  $\mu\text{M}$  Hcy under excitation at 405 nm.

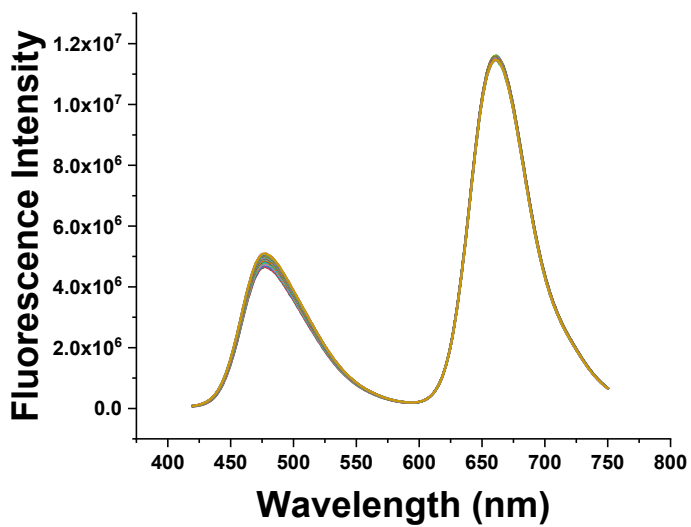

**Figure S18.** Fluorescence spectra of time dependent (30 min) test of 5  $\mu\text{M}$  probe **A** with 500  $\mu\text{M}$  Hcy under excitation at 405 nm.

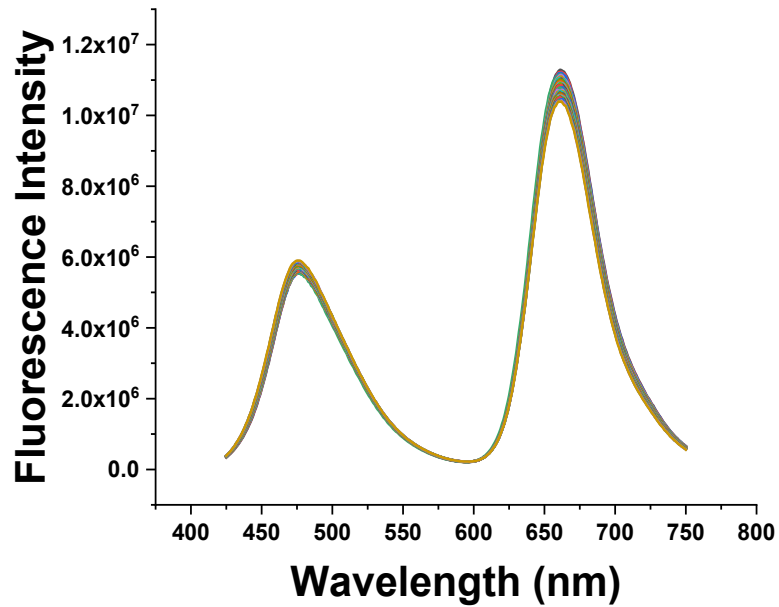

**Figure S19.** Fluorescence spectra of time dependent (30 min) test of 5  $\mu\text{M}$  probe **A** with 1000  $\mu\text{M}$  Hcy under excitation at 405 nm.

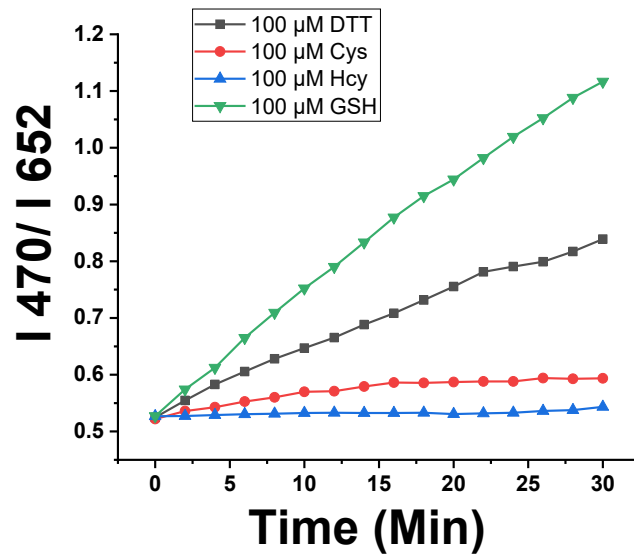

**Figure S20.** Fluorescence wavelength ratiometric plot of 5  $\mu\text{M}$  probe **A** with 100  $\mu\text{M}$  different biothiols or DTT for 30 min, constructed by taking the fluorescence intensity at 470 nm divided by the fluorescence intensity at 652 nm under excitation at 405 nm.

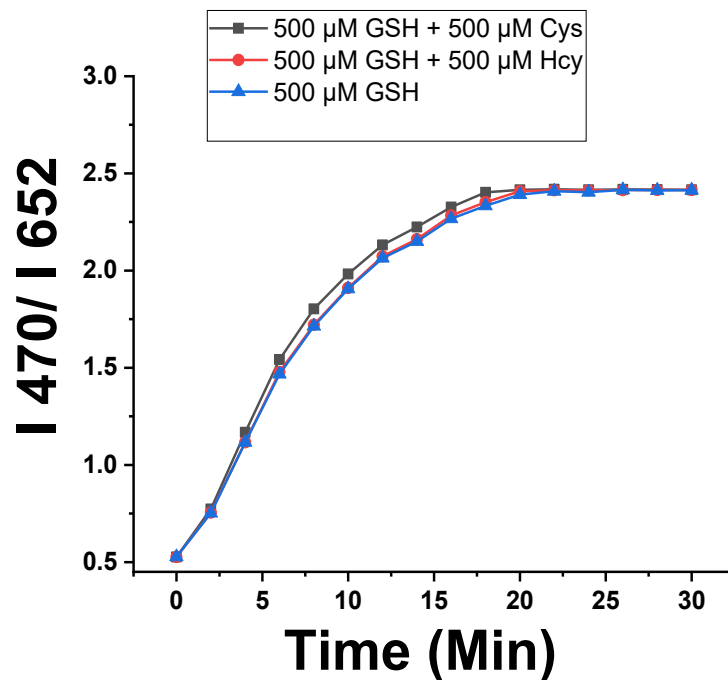

**Figure S21.** Fluorescence wavelength ratiometric plot of 5  $\mu\text{M}$  probe A with 500  $\mu\text{M}$  GSH, 500  $\mu\text{M}$  GSH with 500  $\mu\text{M}$  Cys or 500  $\mu\text{M}$  GSH with 500  $\mu\text{M}$  Hcy for 30 min, constructed by taking the fluorescence intensity at 470 nm divided by the fluorescence intensity at 652 nm under excitation at 405 nm.

## 6. Photostability of probe A

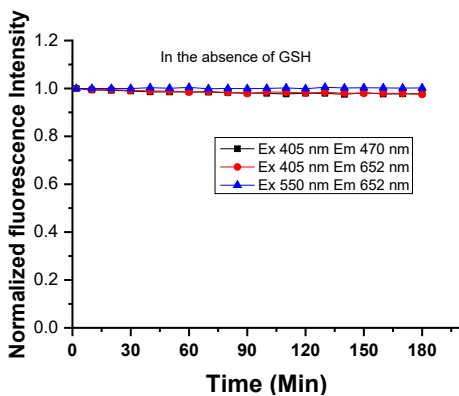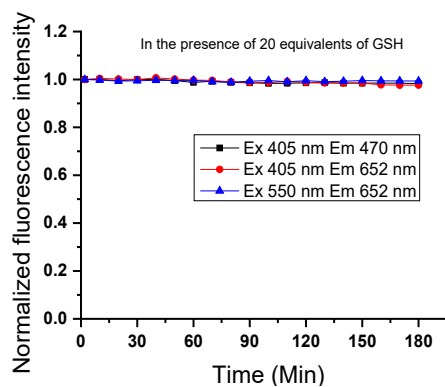

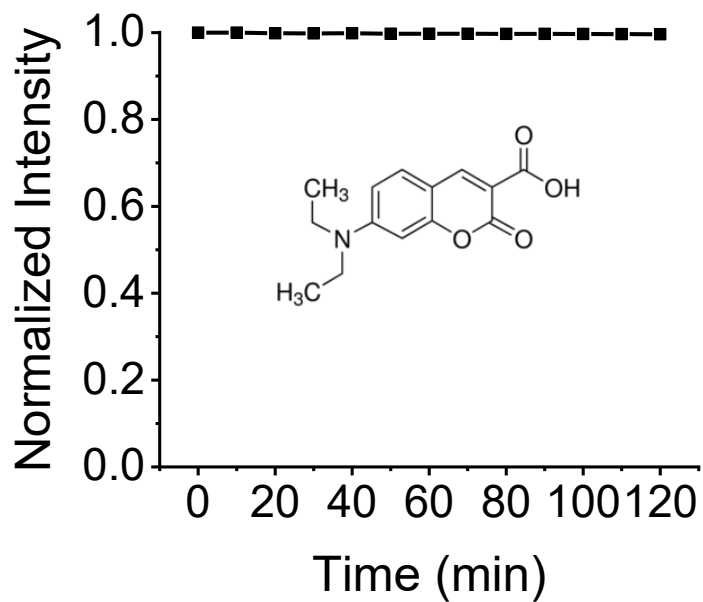

**Figure S22.** Coumarin and rhodamine fluorescence intensity of 5  $\mu$ M probe **A** in the absence (upper, left) and presence (upper, right) of 20 equivalents of GSH in a 20 mM PBS buffer (pH 7.4) containing 30% ethanol under 180-minute excitation at 405 nm or 550 nm. Fluorescence intensity (lower) of 7-(diethylamino)coumarin-3-carboxylic acid in 20 mM PBS buffer (pH 7.4) containing 30% ethanol under 180-minute excitation at 405 nm. Slit: excitation/emission = 5.0/10.0 nm

## 7. Ratiometric image of HeLa cells

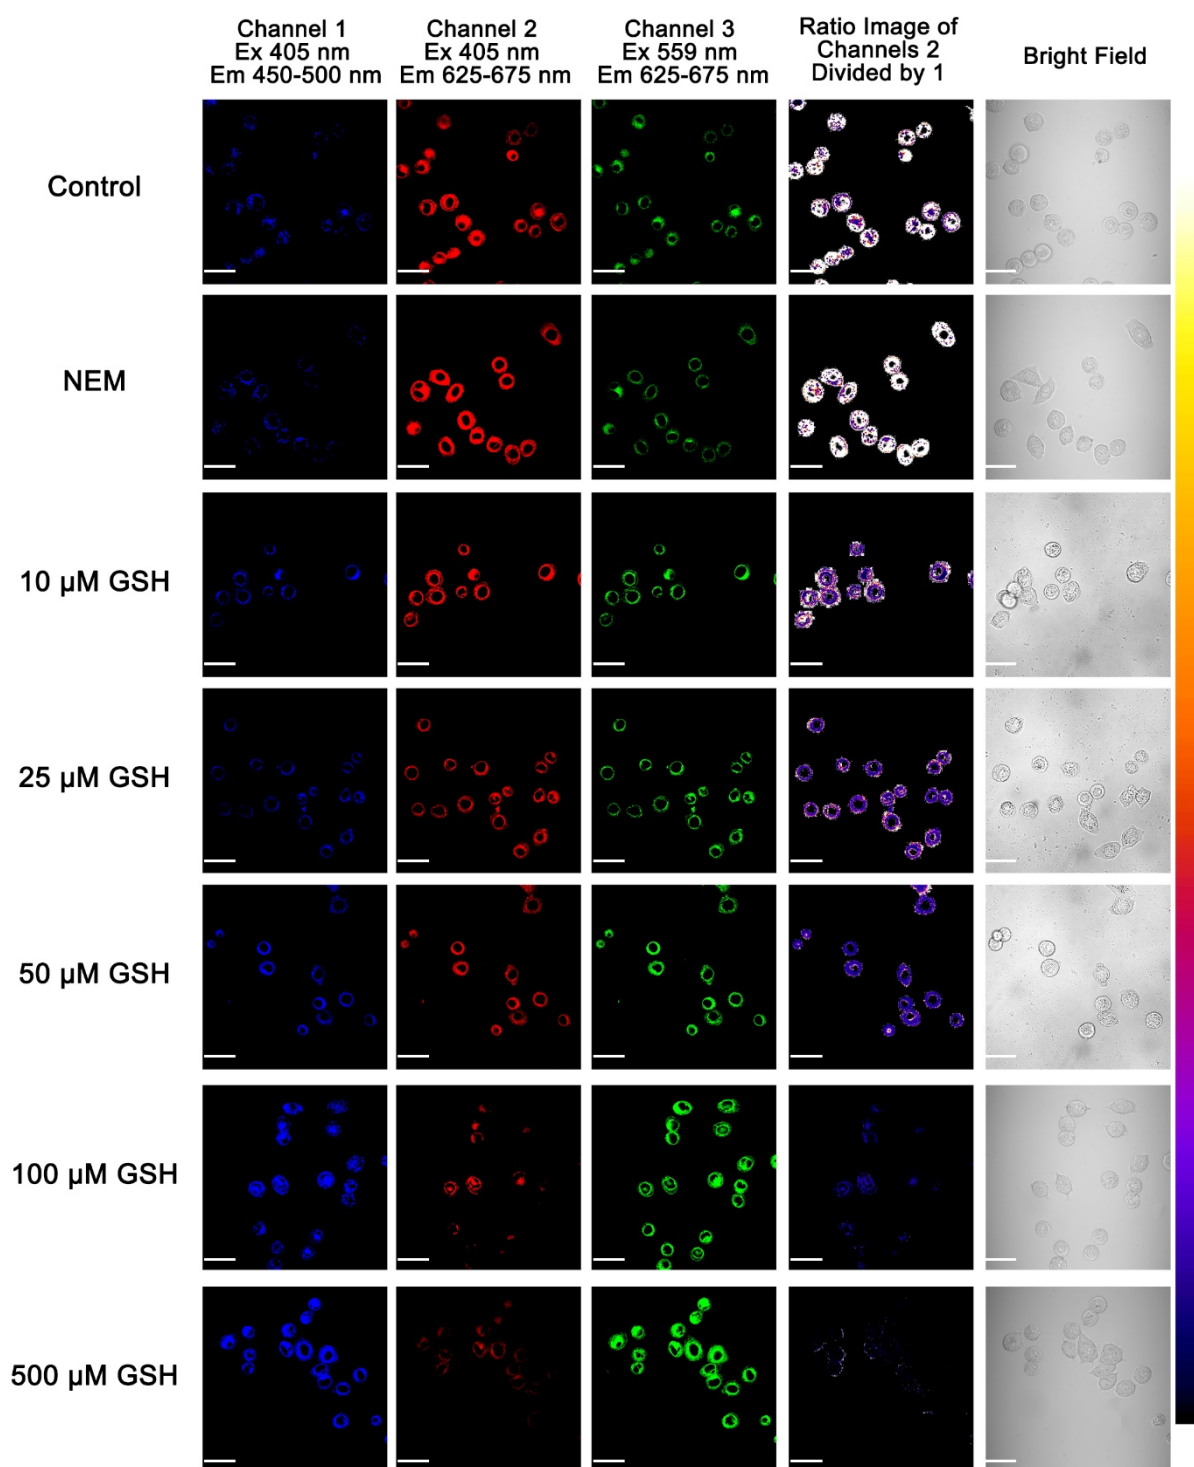

**Figure S23.** Ratiometric cellular fluorescence images of HeLa cells incubated with 10  $\mu$ M probe **A** before and after NEM treatment or external GSH incubation. Scale bar: 50  $\mu$ M.

## Ratiometric image of *Drosophila melanogaster* larvae

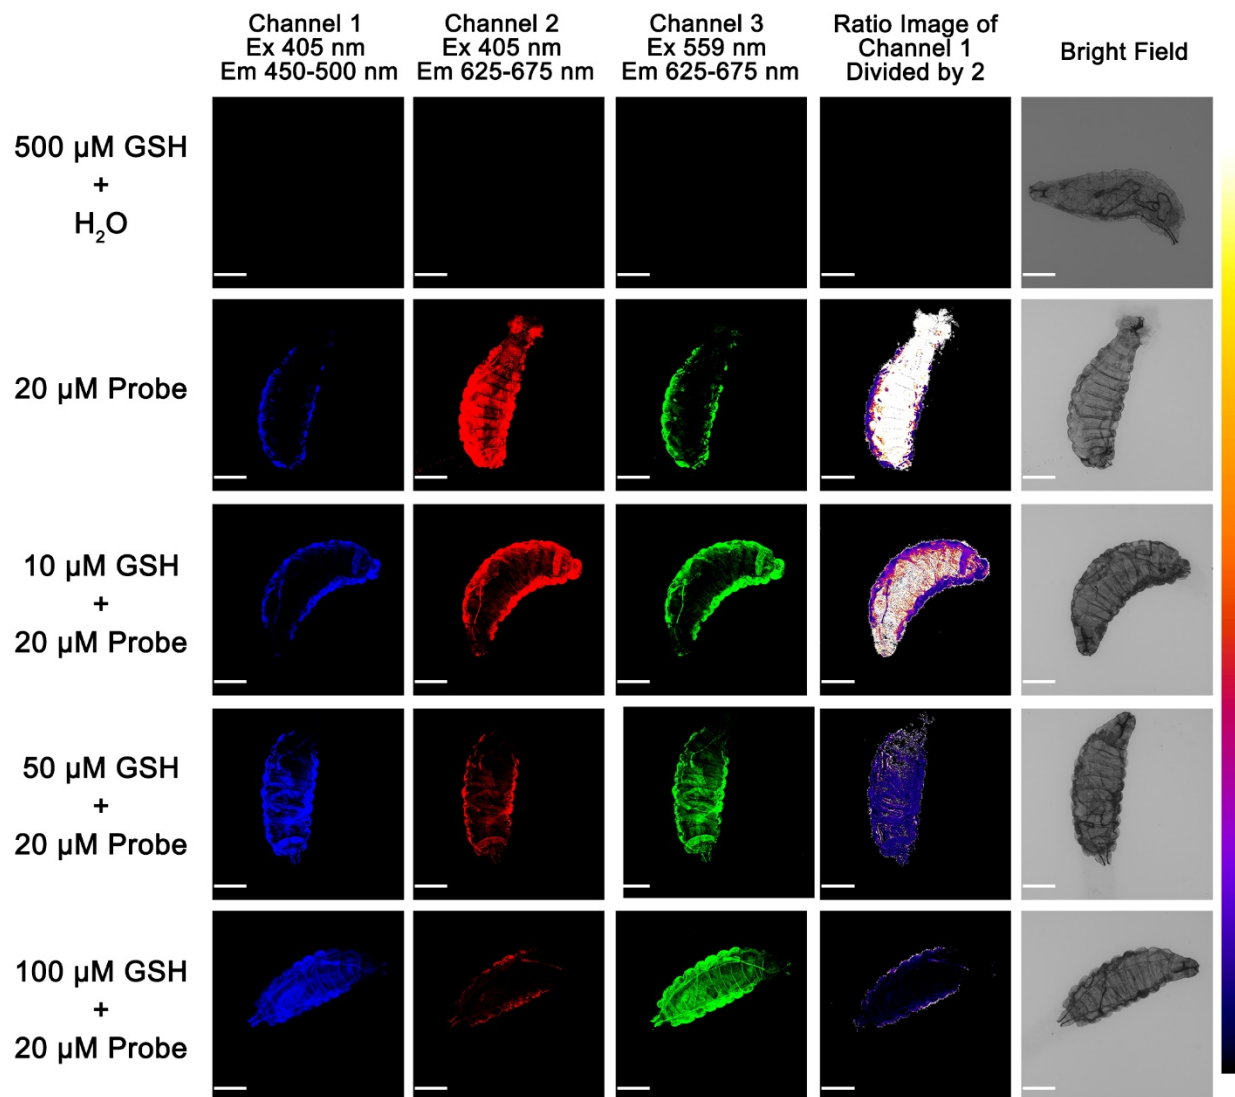

**Figure S24.** Ratiometric fluorescence images of *Drosophila melanogaster* larvae incubated with 10  $\mu\text{M}$  probe A before and after further external GSH incubation. Scale bar: 100  $\mu\text{M}$



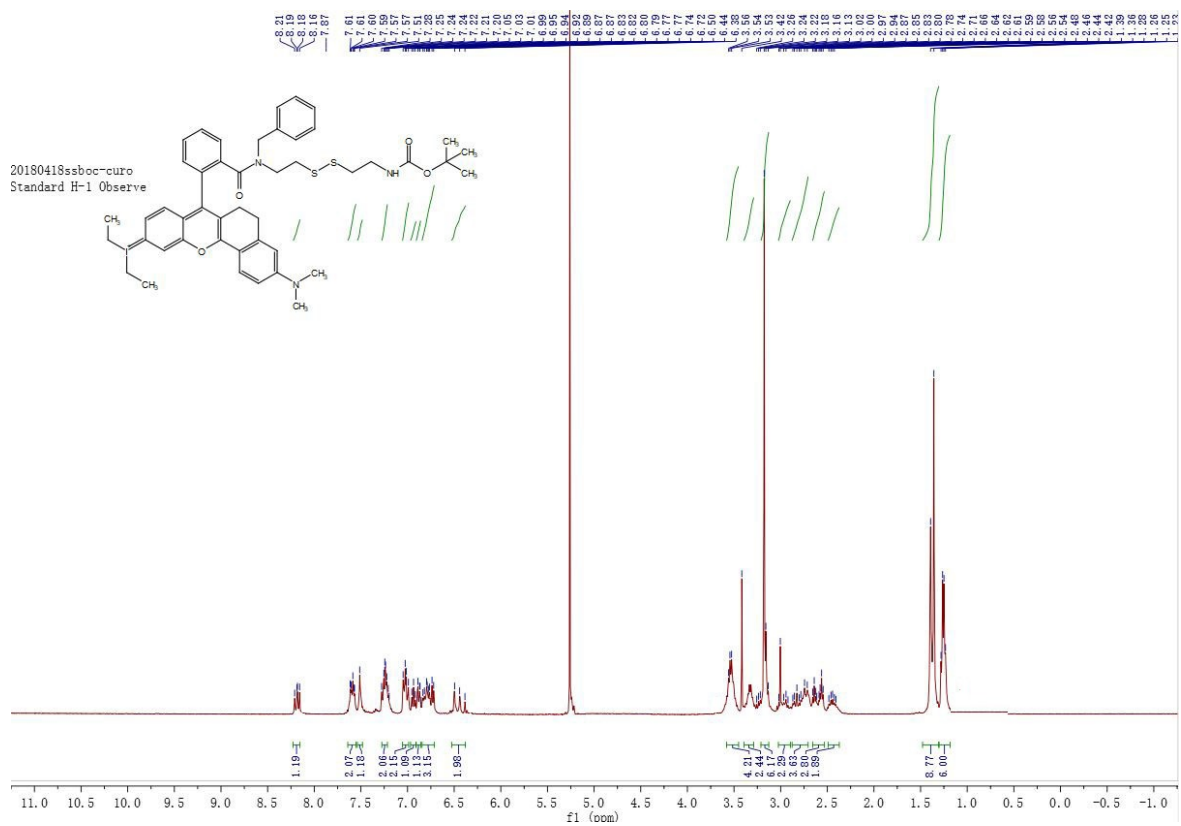

**Figure S25.** <sup>1</sup>H NMR and <sup>13</sup>CNMR of compound 6 in CDCl<sub>3</sub> solution.

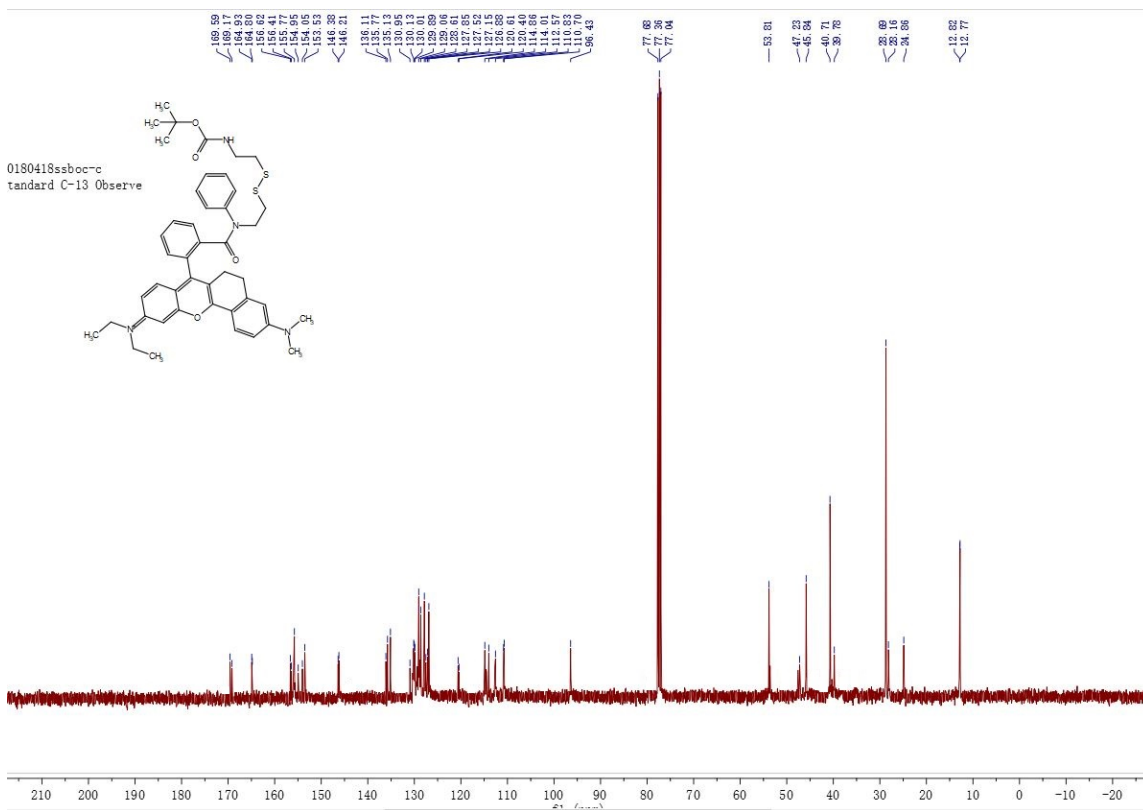

**Figure S26.**  $^{13}\text{C}$  NMR spectrum of compound **6** in  $\text{CDCl}_3$  solution.

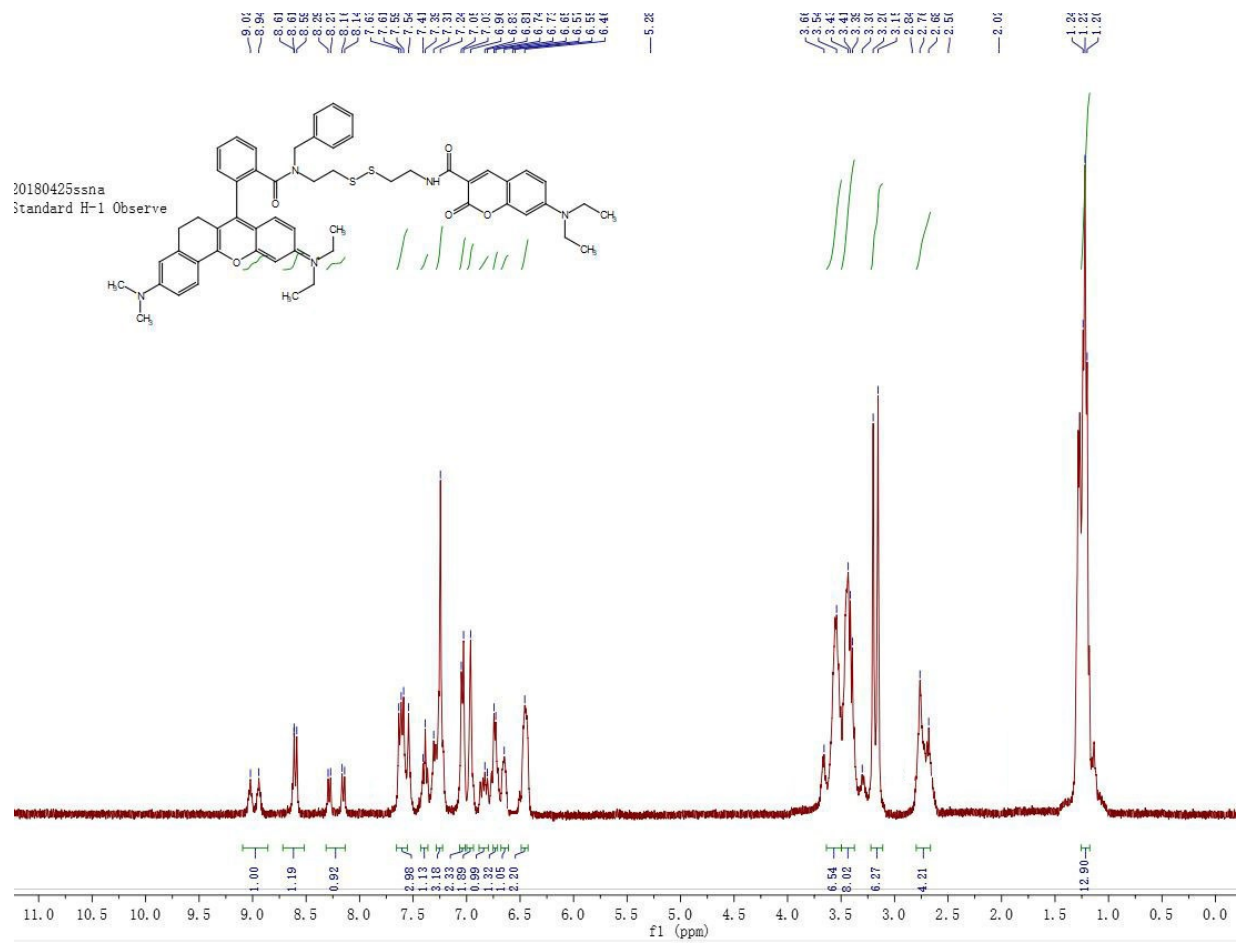

**Figure S27.**  $^1\text{H}$ NMR spectrum of probe **A** in  $\text{CDCl}_3$  solution.

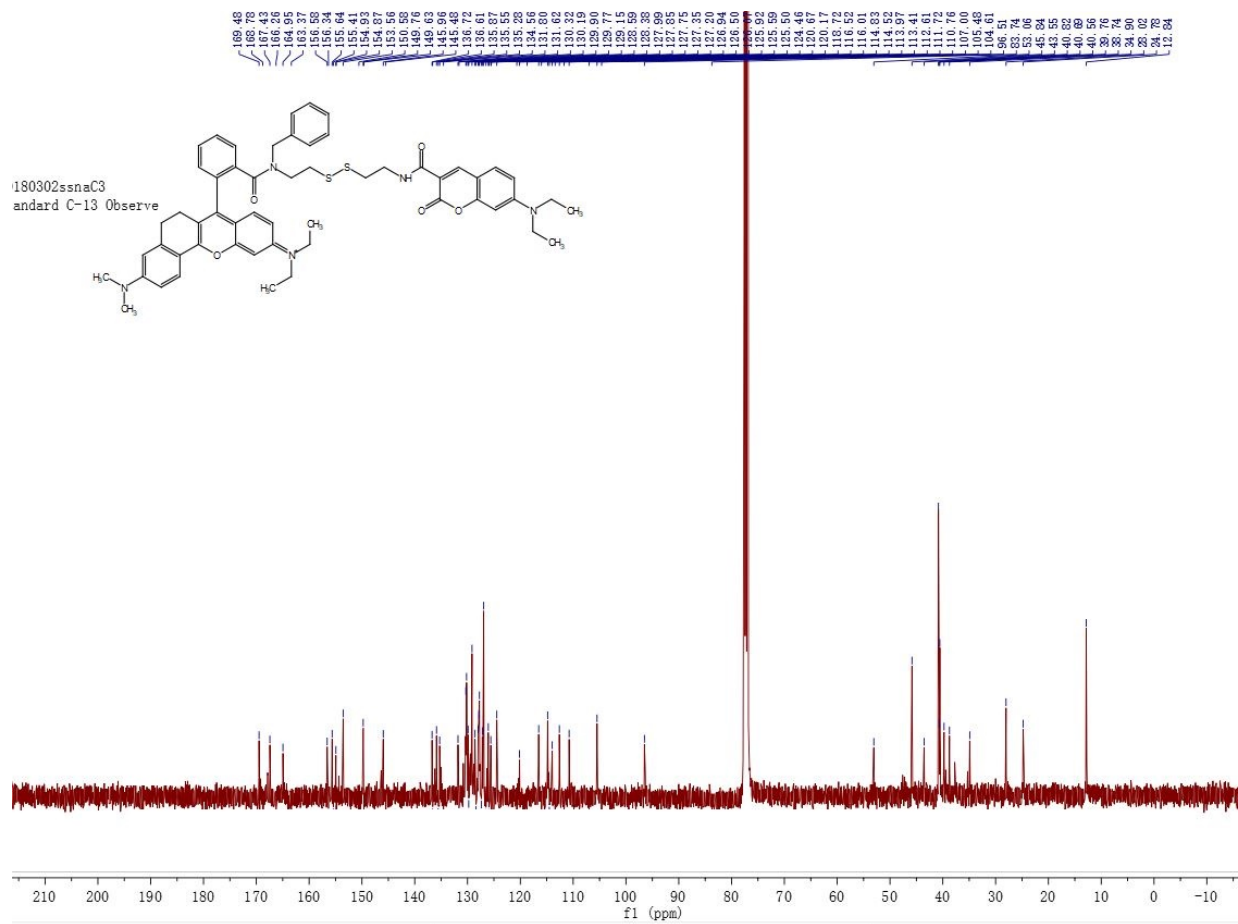

**Figure S28.**  $^{13}\text{C}$  NMR spectrum of probe A in  $\text{CDCl}_3$  solution.

Sample1 #1-100 RT: 0.01-1.40 AV: 100 NL: 8.92E6  
T: FTMS + p ESI Full ms [300.00-1000.00]

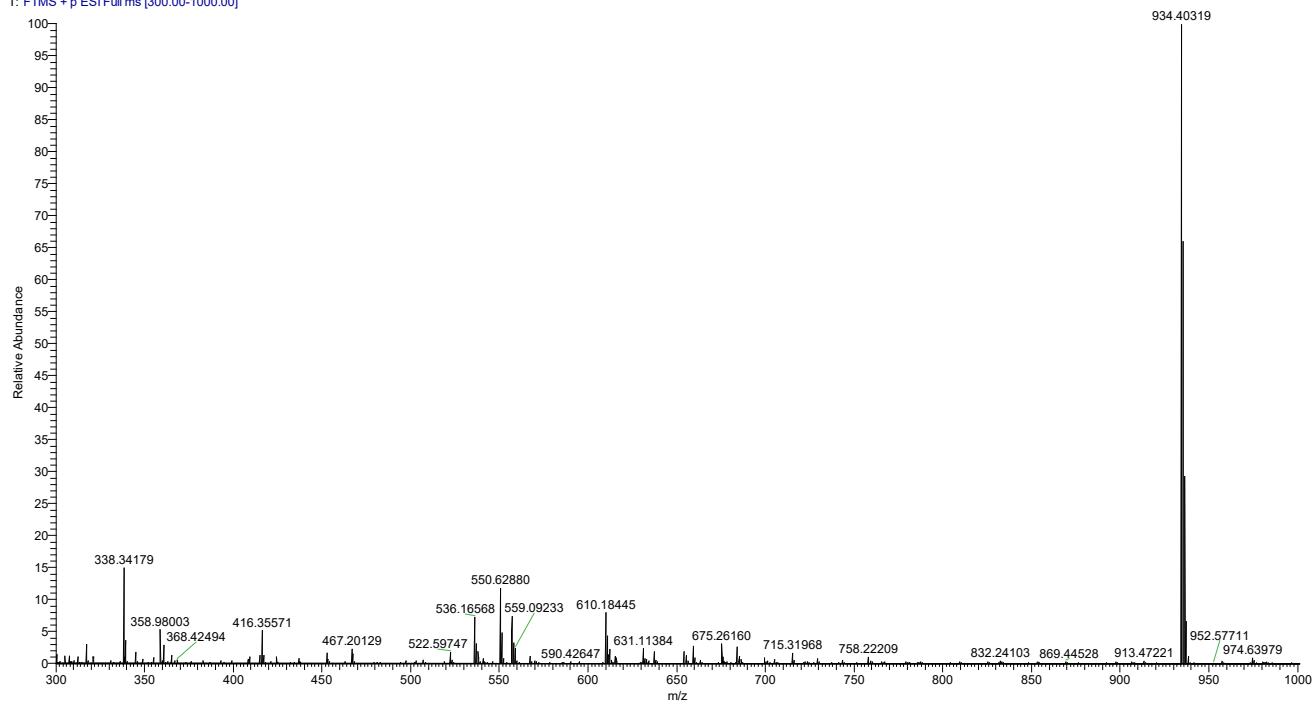

**Figure S29.** HR-MS spectrum of probe A.

Sample2\_300-1000 #1-50 RT: 0.01-0.69 AV: 50 NL: 5.08E6  
T: FTMS + p ESI Full ms [300.00-1000.00]

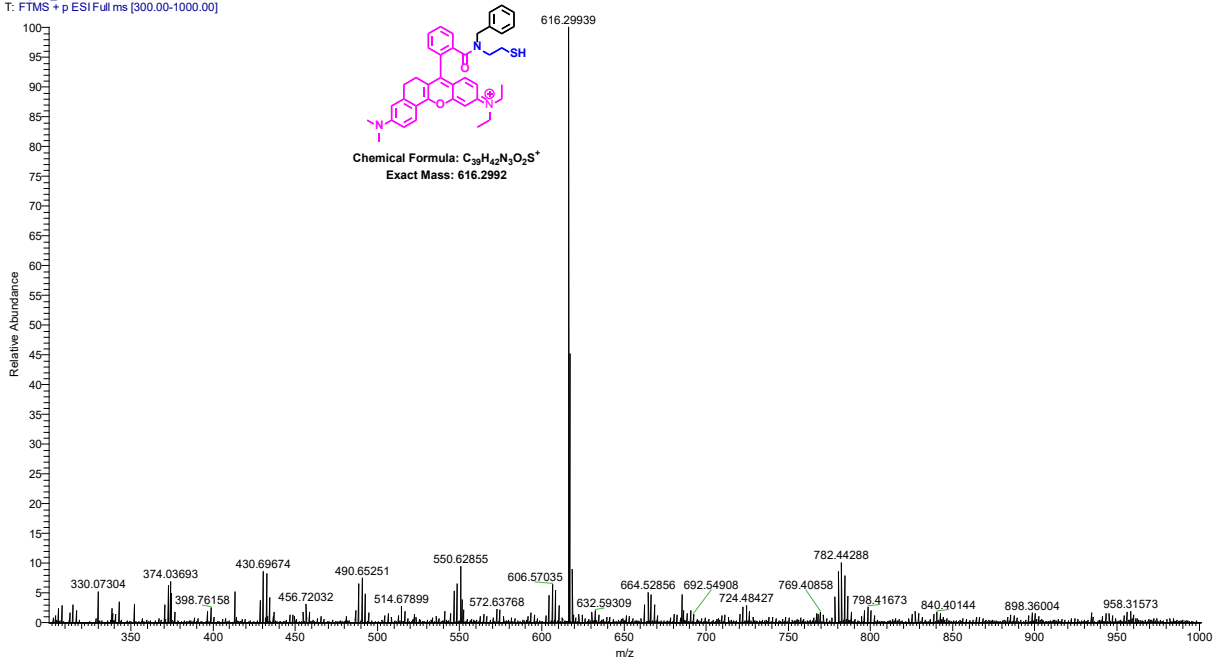

Sample2\_552-1000 #1-100 RT: 0.00-1.36 AV: 100 NL: 6.52E6  
T: FTMS + p ESI Full ms [552.00-1000.00]

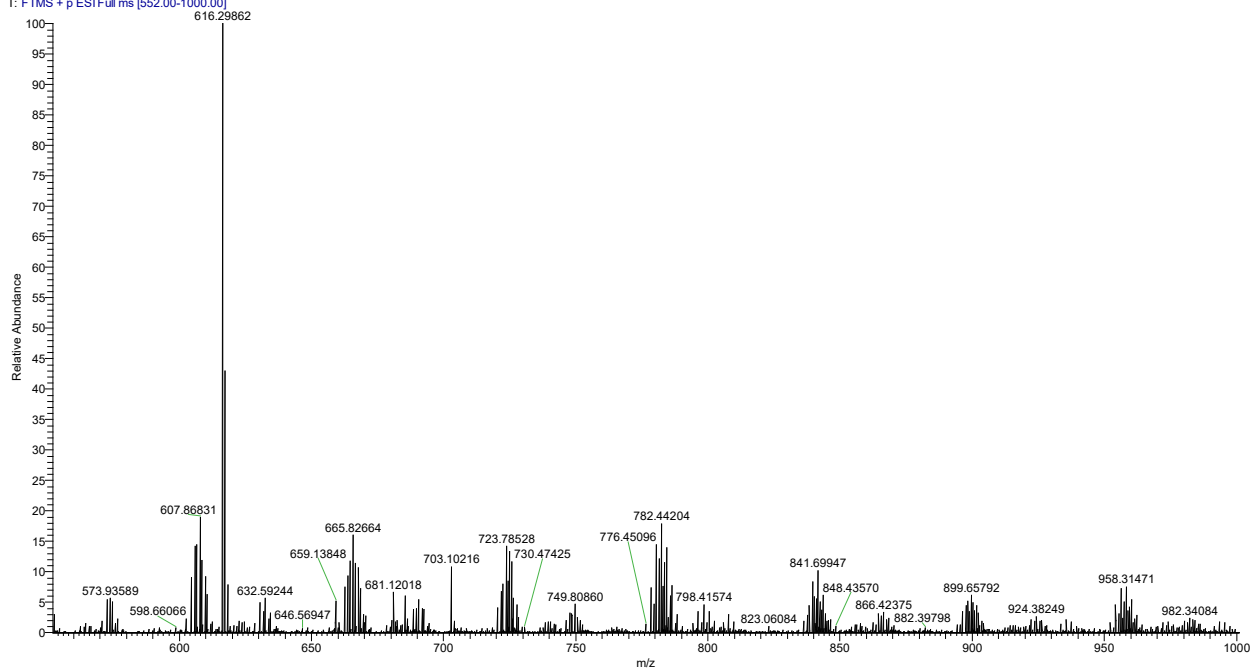

Figure S30. HR-MS spectrums of probe A reactions with DTT (top) and GSH (bottom).

## 8. References

- (1) Zhang, Y. S.; Zhang, J. Q.; Su, M. H.; Li, C. H. Rational molecular design of a reversible BODIPY-Based fluorescent probe for real-time imaging of GSH dynamics in living cells. *Biosens. Bioelectron.* **2021**, *175*, DOI: 10.1016/j.bios.2020.112866.
- (2) Zhang, H.; Yue, X. X.; Li, W. X.; Chen, W. Q.; Wang, Y. G.; Li, X.; Ye, Y.; Song, X. Z. Selective and discriminative fluorescence sensing of Cys, Hcy, GSH and H<sub>2</sub>S with concise and distinct signals. *Sens. Actuator B-Chem.* **2021**, *331*, DOI: 10.1016/j.snb.2020.129394.
- (3) Yue, X. X.; Chen, J. L.; Chen, W. Q.; Wang, B. H.; Zhang, H.; Song, X. Z. An endoplasmic reticulum-targeting fluorescent probe for discriminatory detection of Cys, Hcy and GSH in living cells. *Spectrochimica Acta Part a-Molecular and Biomolecular Spectroscopy* **2021**, *250*, DOI: 10.1016/j.saa.2020.119347.
- (4) Yang, Y. Z.; Xu, Z. Y.; Han, L.; Fan, Y. Z.; Qing, M.; Li, N. B.; Luo, H. Q. A simple fluorescent probe with two different fluorescence signals for rapid sequence distinguishing of Cys/Hcy/GSH and intracellular imaging. *Dyes Pigment.* **2021**, *184*, DOI: 10.1016/j.dyepig.2020.108722.
- (5) Yang, Y.; Feng, Y.; Li, H.; Shen, R.; Wang, Y. Z.; Song, X. R.; Cao, C.; Zhang, G. L.; Liu, W. S. Hydro-soluble NIR fluorescent probe with multiple sites and multiple excitations for distinguishing visualization of endogenous Cys/Hcy, and GSH. *Sens. Actuator B-Chem.* **2021**, *333*, DOI: 10.1016/j.snb.2020.129189.
- (6) Luo, W. F.; Zhang, S.; Meng, Q. H.; Zhou, J.; Jin, R. Y.; Long, X.; Tang, Y. P.; Guo, H. A two-photon multi-emissive fluorescent probe for discrimination of Cys and Hcy/GSH via an aromatic substitution-rearrangement. *Talanta* **2021**, *224*, DOI: 10.1016/j.talanta.2020.121833.
- (7) Zhu, L. L.; Zhang, T. G.; Ma, Y. Y.; Lin, W. Y. Discriminating Cys from GSH/H<sub>2</sub>S in vitro and in vivo with a NIR fluorescent probe. *Sens. Actuator B-Chem.* **2020**, *305*, DOI: 10.1016/j.snb.2019.127202.
- (8) Ren, X. J.; Zhang, Y.; Zhang, F.; Zhong, H.; Wang, J. P.; Liu, X. J.; Yang, Z. G.; Song, X. Z. Red-emitting fluorescent probe for discrimination of Cys/Hcy and GSH with a large Stokes shift under a single-wavelength excitation. *Anal. Chim. Acta* **2020**, *1097*, 245-253, DOI: 10.1016/j.aca.2019.11.030.
- (9) Li, R. X.; Kassaye, H.; Pan, Y. P.; Shen, Y. Z.; Li, W. Q.; Cheng, Y. R.; Guo, J. X.; Xu, Y.; Yin, H. P.; Yuan, Z. W. A visible and near-infrared dual-fluorescent probe for discrimination between Cys/Hcy and GSH and its application in bioimaging. *Biomaterials Science* **2020**, *8* (21), 5994-6003, DOI: 10.1039/d0bm01237h.
- (10) Jia, L.; Niu, L. Y.; Yang, Q. Z. Fluorescent Probe for Simultaneous Discrimination of GSH, Cys, and SO<sub>2</sub> Derivatives. *Anal. Chem.* **2020**, *92* (15), 10800-10806, DOI: 10.1021/acs.analchem.0c02255.
- (11) Wang, L.; Wang, J. B.; Xia, S.; Wang, X. X.; Yu, Y. T.; Zhou, H. W.; Liu, H. Y. A FRET-based near-infrared ratiometric fluorescent probe for detection of mitochondria biothiol. *Talanta* **2020**, *219*, DOI: 10.1016/j.talanta.2020.121296.
- (12) Xia, S.; Zhang, Y. B.; Fang, M. X.; Mikesell, L.; Steenwinkel, T. E.; Wan, S. L.; Phillips, T.; Luck, R. L.; Werner, T.; Liu, H. Y. A FRET-Based Near-Infrared Fluorescent Probe for Ratiometric Detection of Cysteine in Mitochondria. *Chembiochem* **2019**, *20* (15), 1986-1994, DOI: 10.1002/cbic.201900071.

- (13) Yuan, L.; Lin, W.; Yang, Y.; Chen, H. A Unique Class of Near-Infrared Functional Fluorescent Dyes with Carboxylic-Acid-Modulated Fluorescence ON/OFF Switching: Rational Design, Synthesis, Optical Properties, Theoretical Calculations, and Applications for Fluorescence Imaging in Living Animals. *Journal of the American Chemical Society* **2012**, *134* (2), 1200-1211, DOI: 10.1021/ja209292b.
- (14) Zhang, Y.; Xia, S.; Fang, M.; Mazi, W.; Zeng, Y.; Johnston, T.; Pap, A.; Luck, R. L.; Liu, H. New near-infrared rhodamine dyes with large Stokes shifts for sensitive sensing of intracellular pH changes and fluctuations. *Chemical Communications* **2018**, *54* (55), 7625-7628, DOI: 10.1039/C8CC03520B.
- (15) Brouwer, A. M. Standards for photoluminescence quantum yield measurements in solution (IUPAC Technical Report). *Pure and Applied Chemistry* **2011**, *83* (12), 2213-2228, DOI: 10.1351/pac-rep-10-09-31.
- (16) Gong, Y.-J.; Zhang, X.-B.; Mao, G.-J.; Su, L.; Meng, H.-M.; Tan, W.; Feng, S.; Zhang, G. A unique approach toward near-infrared fluorescent probes for bioimaging with remarkably enhanced contrast. *Chemical Science* **2016**, *7* (3), 2275-2285, DOI: 10.1039/C5SC04014K.
- (17) Rojas-Chapana, J.; Troszczyńska, J.; Firkowska, I.; Morszeck, C.; Giersig, M. Multi-walled carbon nanotubes for plasmid delivery into Escherichia coli cells. *Lab on a Chip* **2005**, *5* (5), 536-539.
